1 **Title: Influence of socio-ecological factors on COVID-19 risk: a cross-sectional study**  
2 **based on 178 countries/regions worldwide**

3

4 Dai Su<sup>1,2</sup>, Yingchun Chen<sup>1,2</sup>, Kevin He<sup>3</sup>, Tao Zhang<sup>4</sup>, Min Tan<sup>1,2</sup>, Yunfan Zhang<sup>1,2</sup>,  
5 Xingyu Zhang<sup>5</sup>

6 <sup>1</sup> Department of Health Management, School of Medicine and Health Management, Tongji Medical  
7 College, Huazhong University of Science and Technology, Wuhan, China

8 <sup>2</sup> Research Center for Rural Health Services, Hubei Province Key Research Institute of Humanities  
9 and Social Sciences, Wuhan, China

10 <sup>3</sup> Department of Biostatistics, University of Michigan School of Public Health, Ann  
11 Arbor, United States

12 <sup>4</sup> Department of Epidemiology and Health Statistics, West China School of Public Health and West  
13 China fourth Hospital, Sichuan University, Sichuan, China

14 <sup>5</sup> Department of Systems, Populations, and Leadership, University of Michigan School of Nursing,  
15 Ann Arbor, United States

16

17 Corresponding to:

18 Xingyu Zhang (zhangxyu@umich.edu)

19 Department of Systems, Populations, and Leadership,

20 University of Michigan School of Nursing

21 Ann Arbor, Michigan

22

23

24 Word counts

25 Abstract word counts: 295

26 Main text word counts: 5236

27

28

29

30

31

32

33

34

35

36

37

38 **Abstract**

39 **Background:** The initial outbreak of COVID-19 caused by SARS-CoV-2 in China in 2019 has  
40 been severely tested in other countries worldwide. We aimed to describe the spatial distribution  
41 of the COVID-19 pandemic worldwide and assess the effects of various socio-ecological factors  
42 on COVID-19 risk.

43 **Methods:** We collected COVID-19 pandemic infection data and social-ecological data of 178  
44 countries/regions worldwide from three database. We used spatial econometrics method to  
45 assess the global and local correlation of COVID-19 risk indicators for COVID-19. To estimate  
46 the adjusted incidence rate ratio (IRR), we modelled negative binomial regression analysis with  
47 spatial information and socio-ecological factors.

48 **Findings:** The study indicated that 37, 29 and 39 countries/regions were strongly opposite from  
49 the IR, CMR and DCI index "spatial autocorrelation hypothesis", respectively. The IRs were  
50 significantly positively associated with GDP per capita, the use of at least basic sanitation  
51 services and social insurance program coverage, and were significantly negatively associated  
52 with the proportion of the population spending more than 25% of household consumption or  
53 income on out-of-pocket health care expenses and the poverty headcount ratio at the national  
54 poverty lines. The CMR was significantly positively associated with urban populations, GDP per  
55 capita and current health expenditure, and was significantly negatively associated with the  
56 number of hospital beds, number of nurses and midwives, and poverty headcount ratio at the  
57 national poverty lines. The DCI was significantly positively associated with urban populations,  
58 population density and researchers in R&D, and was significantly negatively associated with the  
59 number of hospital beds, number of nurses and midwives and poverty headcount ratio at the  
60 national poverty lines. We also found that climatic factors were not significantly associated with  
61 COVID-19 risk.

62 **Conclusion:** Countries/regions should pay more attention to controlling population flow,  
63 improving diagnosis and treatment capacity, and improving public welfare policies.

64 **Keywords:** socio-ecological factors; COVID-19 risk; cross-sectional study; 178  
65 countries/regions worldwide

66

67

68

69

70

71

72

73

74

75

## 76 1. Introduction

77 The novel coronavirus disease (COVID-19) that has spread to more than one hundred countries  
78 and killed hundreds of thousands of people has officially been categorized as a pandemic by the  
79 World Health Organization. The initial outbreak of COVID-19 caused by SARS-CoV-2 in China  
80 in 2019 has been severely tested in other countries worldwide. As of April 6, 2020, COVID-19  
81 had infected 1,345,048 patients in 184 countries/regions and caused 74,565 deaths, as  
82 countries worldwide responded to a human-to-human respiratory disease pandemic caused by  
83 COVID-19. Emerging infectious diseases (EIDs), such as SARS and COVID-19, pose a vast  
84 economic and public health burden worldwide [1,2].

85 COVID-19 not only seriously endangers people's life safety and health but also greatly affects  
86 economic globalization. To address the challenges posed by COVID-19, the links among the  
87 transmission of COVID-19, socio-economic factors and climatic factors must be understood to  
88 suggest better strategies for predicting, preventing, coping with and mitigating the associated  
89 challenges. Simultaneously, given that the climate and socio-economic context are unlikely to  
90 change in the short term, it is easier to intervene accordingly [3]. The spread of many EIDs has  
91 been reported to be influenced by socio-ecological factors, including socio-economic and  
92 climate factors [1,2,4–7]. Previous studies have found that climatic conditions limit the  
93 geographical and seasonal distribution of EIDs, and weather affects the timing and intensity of  
94 outbreaks [8–12]. In addition, whereas climate patterns may control the potential global  
95 distribution of EIDs, the actual size and spatial scope of a region may be controlled by several  
96 non-climatic factors associated with transmission, including epidemiological, socio-economic  
97 and demographic factors [13–18]. However, research on the climatic and socio-economic  
98 drivers of COVID-19 transmission remains lacking, especially regarding the effects of socio-  
99 economic factors and the total effects of socio-ecological factors. Ignoring important non-  
100 climatic factors or other confounding factors (such as urban development, economic growth,  
101 poverty, health, infrastructure, science and technology, social security and labor) would  
102 overestimate the effects of climate change. Therefore, studying the influence of socio-ecological  
103 factors on the transmission risk of EIDs is highly important.

104 For most EIDs, three elements are essential: an agent (or pathogen), a host (or vector) and the  
105 environment of transmission [19]. Appropriate climatic and weather conditions are necessary for  
106 the survival, reproduction, distribution and transmission of disease pathogens, vectors and  
107 hosts. Therefore, changes in climate or weather conditions may affect EIDs by affecting  
108 pathogens, vectors, hosts and their living environments [19–21]. Although many climate  
109 variables may influence the transmission of EIDs, some studies have shown that changes in the  
110 four main variables have the greatest effects on infected diseases with strong environmental  
111 components (temperature, precipitation, relative humidity (RH) and wind) [22–26]. In recent  
112 studies, although the severity of some cases of COVID-19 has mimicked that of SARS-CoV  
113 cases [27–30], the reproductive number (average  $R_0=3.28$ ) of COVID-19 is higher than that of  
114 SARS-CoV; therefore, considering the climate and environment may improve understanding of  
115 the pathogen's vectorial capacity and basic reproduction number, and the risk of transmission of  
116 COVID-19 [31,32].

117 In recent decades, many rapid and pronounced changes in human social ecology have altered  
118 the likelihood of the emergence and spread of infectious diseases [33–35]. These changes  
119 include increases in population size and density; urbanization; persistent poverty (especially in  
120 the expansion of urban slums); the number and movement of political, economic and

121 environmental refugees; differences in infrastructure and science and technology; and poor  
122 health awareness [36]. The socio-economic environment contributes significantly to the health  
123 of individuals as well as communities [37] and is the root cause of health and health equity.  
124 These socio-economic drivers have contributed to the shifting global ecology of vector  
125 transmission that enabled COVID-19 to emerge worldwide, by dangerously uniting the human  
126 hosts, vectors and pathogen. Socioeconomic changes interact with environmental changes in  
127 promoting EID spread and increase the harm of EIDs to humans.

128 The purpose of this study was to describe the spatial distribution of the COVID-19 pandemic  
129 worldwide, and assess the effects of different socio-ecological factors, including climate and  
130 socio-economic factors, on COVID-19 risk in 178 countries/regions worldwide, including  
131 incidence rate (IR), cumulative mortality rate (CMR) and daily cumulative index (DCI). In  
132 addition, this study analyzed intervention policies in different countries and regions to establish  
133 early warning and decision support systems and provide guidance for COVID-19 management  
134 in different countries/regions.

135

## 136 **2. Methods**

### 137 **2.1. Concept model**

138 According to previous research [38–41], we established the Potential Risk Assessment  
139 Framework for COVID-19 (Figure 1). The influence of global socio-ecological factors (climate  
140 and socio-economic factors) on the risk of COVID-19 can be tested by its influence on the  
141 following three disease components: agent (or pathogen), host (or vector) and the environment  
142 of transmission. A combination of natural and human influences led to the COVID-19 pandemic.  
143 We used three main variables to assess the potential risk of COVID-19: IR, CMR and DCI.

### 144 **2.2 Definitions of different cases for COVID-19**

145 A confirmed case of COVID-19 infection was defined by laboratory confirmation of the virus  
146 causing COVID-19 infection, regardless of clinical signs and symptoms [42–44]. However, some  
147 reported case numbers from China have included people with symptoms of COVID-19 without  
148 laboratory confirmation. The definitions of COVID-19 related deaths differ across countries. In  
149 Italy, any death of a person with positive reverse transcriptase–polymerase chain reaction (RT-  
150 PCR) testing for SARS-CoV-2 is considered COVID-19 related.

### 151 **2.3 Data collection**

#### 152 **2.3.1 Outcome variables**

153 A dashboard published and hosted by researchers at the Center for Systems Science and  
154 Engineering, Johns Hopkins University (JHU-CSSE) [45] shows the numbers and locations of  
155 confirmed COVID-19 cases, deaths and recoveries in all affected countries. All collected data  
156 on COVID-19 from the Johns Hopkins University are made freely available by the researchers  
157 through a GitHub repository. All manual updates (for countries and regions outside mainland  
158 China) are coordinated by a team at Johns Hopkins University. We extracted the global time  
159 series data of confirmed and recovered cases and deaths due to COVID-19 from the JHU-  
160 CSSE GitHub repository. The data were recorded from January 22, 2020 and were updated  
161 once daily around 23:59 (UTC). We selected the cross-sectional data from April 6, 2020. On the

162 basis of the availability of the data, we extracted 178 countries from the database (excluding  
163 countries/regions without COVID-19 cases and some unmatched countries/regions, such as  
164 Taiwan, China). The first-level geographical unit of the dataset is the country/region, and the  
165 second-level geographical unit is the province/state. We uniformly selected first-level  
166 geographical units (countries/regions). In addition, we further classified the countries/regions in  
167 the data set according to UN geographical divisions and divided the countries with epidemic  
168 COVID-19 into 20 regions. As previously mentioned, for outcome variables, we selected IR,  
169 CMR and DCI as indicators to measure COVID-19 risk. The specific calculation process is  
170 shown in Table 1.

171 IR was used to describe the distribution of COVID-19, explore the etiological factors, propose an  
172 etiological hypothesis, and evaluate the efficacy of detection and prevention measures. CMR  
173 reflects the total deaths due to COVID-19 and is an indicator of the risk of death from COVID-19.  
174 DCI mainly describes the growth rate of COVID-19 in different countries/regions and is a  
175 measure of the risk of disease transmission. The World Health Organization, on March 11, 2020,  
176 declared the COVID-19 outbreak a global pandemic, thus indicating that COVID-19 had broadly  
177 spread worldwide. Therefore, when we considered IR, CMR and DCI in different  
178 countries/regions, these measures reflected not only the rapid growth in the number of people  
179 infected with COVID-19 but also the detection level in the entire country/region, which was used  
180 to identify more people infected with COVID-19.

### 181 **2.3.2 Climate data**

182 We obtained daily meteorological observation values from the Global Surface Summary of the  
183 Day (GSOD) via The Integrated Surface Hourly (ISH) dataset. The ISH dataset includes global  
184 data obtained from the USAF Climatology Center, which is located in the Federal Climate  
185 Complex with NCDC. GSOD comprises 12 daily averages computed from global hourly station  
186 data. Except in United States stations, 24-hour periods are based on UTC times. The latest  
187 daily summary data are normally available 1–2 days after the date-time of the observations  
188 used in the daily summaries. More than 9,000 stations' data worldwide are typically available.  
189 Daily weather elements include mean values of temperature, dew point temperature, sea level  
190 pressure, station pressure, visibility, wind speed, maximum and minimum temperature,  
191 maximum sustained wind speed and maximum gust, precipitation amount, snow depth and  
192 weather indicators. However, we chose the climate data from April 6, 2020 and selected four  
193 variables from the GSOD dataset that significantly affected COVID-19 risk: (1) mean  
194 temperature (.1 Fahrenheit); (2) mean dew point (.1 Fahrenheit); (3) mean wind speed (.1 knots);  
195 and (4) precipitation amount (.01 inches). The reason for extracting the average dew point  
196 variable was to calculate the RH value by using this variable and the temperature variable. The  
197 temperature and dew point in Celsius were used to calculate the RH according to the  
198 temperature and dew point at each time point [46]:

$$199 \quad C = \frac{F - 32}{1.8}$$

$$200 \quad RH = e^{\frac{17.625D}{243.04+D} - \frac{17.625T}{243.04+T}}$$

201 where  $C$  is the temperature in Celsius,  $F$  is the temperature in Celsius,  $D$  is the mean dew  
 202 point for the day in Celsius,  $T$  is the mean temperature for the day in Celsius, and  $e$  is the  
 203 base of the natural log.

### 204 2.3.3 Socio-economic data

205 Indicators of socio-economic factors affecting the spread of COVID-19 were derived from the  
 206 World Development Indicators dataset, the primary World Bank collection of development  
 207 indicators, which compiles relevant, high-quality and internationally comparable statistics about  
 208 global development and the fight against poverty. The database contains 1,600 time series  
 209 indicators for 217 economies and more than 40 country groups, and data for many indicators  
 210 cover a period of more than 50 years. As shown in Table 2, we selected 32 indicators affecting  
 211 COVID-19 risk in seven dimensions in 178 countries/regions. The index value for 2019 was  
 212 taken as the priority for each indicator. If the index was missing in 2019, the index value of the  
 213 most recent year was selected as a substitute.

## 214 2.4 Statistical analysis

### 215 2.4.1. Spatial econometrics method

216 First, we used Moran's  $I$  to measure the global correlation of COVID-19 risk indicators [47].  
 217 Global Moran's  $I$  is a measure of global spatial autocorrelation, and the value of Moran's  $I$   
 218 usually ranges from  $-1$  to  $+1$ . Values significantly below  $-1/(N-1)$  indicate negative spatial  
 219 autocorrelation, and values significantly above  $-1/(N-1)$  indicate positive spatial autocorrelation.  
 220 If significant global spatial autocorrelation was found, we then used local indicators of spatial  
 221 autocorrelation (LISA) to evaluate the locations of COVID-19 clusters. The meaning of local  
 222 Moran's  $I_i$  is similar to that of global Moran's  $I$ . A positive  $I_i$  indicates that the high (or low) value  
 223 of region  $i$  is surrounded by the surrounding high (or low) value; A negative  $I_i$  indicates that the  
 224 high (or low) value of region  $i$  is surrounded by the surrounding low (or high) value. The general  
 225 models are described in Eq. 1–2.

$$226 \text{ Moran's } I = \frac{n \sum_{i=1}^n \sum_{j=1}^n w_{ij} (x_i - \bar{x})(x_j - \bar{x})}{n \sum_{i=1}^n \sum_{j=1}^n w_{ij} \sum_{i=1}^n (x_i - \bar{x})^2} \quad (1)$$

$$227 \text{ Local Moran's } I = \frac{n(x_i - \bar{x}) \sum_j w_{ij} (x_j - \bar{x})}{\sum_i (x_i - \bar{x})^2} \quad (2)$$

228 where  $n$  is the number of spatial units indexed by  $i$  and  $j$ ,  $x$  is the variable of social ecology  
 229 factors,  $\bar{x}$  is the mean of  $x$ , and  $w_{ij}$  is a matrix of spatial weights with zeroes on a diagonal  
 230 (i.e.,  $w_{ii}=0$ ).

231 Second, to better approximate the real infectious disease spatial spread process, we fit a one-  
 232 order spatial autoregressive regression model comprising spatial lags. Because we believed  
 233 that COVID-19 risk transmission in a certain country/region would be different for neighboring

234 countries/regions, we sought to reflect this difference in the model. A one-order spatial  
235 autoregressive process takes the form (Eq. 3) [48]:

$$236 \quad Y = \delta WY + \varepsilon \quad (3)$$

237 where  $\delta$  is the spatial autoregressive coefficient,  $W$  is the  $i, j$ -th element of the exogenous,  
238 non-negative  $N \times N$  spatial weight matrix with zero diagonal elements that describes the  
239 arrangement of the spatial units in the countries/regions, and  $\varepsilon$  is i.i.d. innovations with zero  
240 mean and finite variance  $\sigma^2$ . For simplicity, in this paper, we assumed that the spatial weight  
241 matrix  $W$  was non-standardized and also used a queen spatial weight matrix.

#### 242 2.4.2. Processing of missing values

243 Before negative binomial regression, the k-nearest neighbors (k-NN) approach was used to  
244 impute missing data for some socio-ecological variables. For a given patient with missing values,  
245 the k-NN method identifies the k-nearest countries/regions on the basis of Euclidean distance.  
246 Using these countries/regions, we then replaced missing values by using a majority vote for  
247 discrete variables and weighted means for continuous features. One advantage of using this  
248 method is that missing values in all features are imputed simultaneously without the need to  
249 treat features individually.

#### 250 2.4.3. Negative binomial regression

251 First, we established the correlation matrix of socio-economic factors to check for  
252 multicollinearity. If there was a strong correlation ( $> 0.8$ ) among socio-economic factors, then we  
253 removed the factor with strong correlation with other variables. Then, the incidence rate ratio  
254 (IRR) of each socio-ecological factor was calculated with single factor negative binomial  
255 regression analysis, that is, the effect of each socio-ecological factor on COVID-19 risk by  
256 changing the average COVID-19 risk value by a specific unit quantity. The spatial  
257 autoregressive models comprising spatial lags, which were a weighted average of observations  
258 on the diseases over neighboring units, were input into the model to adjust for spatial variation  
259 in COVID-19 risk. Modeled values of climate factors were centered on the mean values for each  
260 station in every country/region [49]. The factors with  $P < 0.05$  were included in the multi-factor  
261 negative binomial regression analysis with spatial information to calculate the adjusted IRR  
262 (aIRR). The general model is described in Eq. 4.

$$263 \quad y_i = \alpha + \delta WY + \beta_1 T_i + \beta_2 H_i + \beta_3 M_i + \beta_4 P_i + \sum S_n + \varepsilon_i \quad (4)$$

264 where  $y_i$  denotes the daily counts of COVID-19 risk indicators in county/region  $i$ ;  $WY$   
265 represents spatial lags, and  $W$  is the spatial weight;  $S_n$  represents socio-economic factors (all  
266 variables are in Table 2);  $T_i$  is the mean temperature in county/region  $i$ ;  $H_i$  is the RH in  
267 county/region  $i$ ;  $M_i$  is the wind speed in county/region  $i$ ;  $P_i$  is the precipitation amount in  
268 county/region  $i$ ; and  $\varepsilon_i$  is a random intercept.

269 Sensitivity analyses with maximum and minimum temperatures instead of average temperatures  
270 were also conducted with the same procedures, in which we used the same non-informative  
271 priors for the minimum and maximum temperatures [49, 50]. All statistical analyses were

272 performed in Stata statistical software Version 15, and p-values were two-tailed, with statistical  
273 significance set at .05. ArcMap 10.7 and Geoda software were used to process basic geographic  
274 information. Data visualization mainly used RStudio software Version 1.2.5033.

275

### 276 **3. Results**

#### 277 **3.1 Characteristics of 178 countries/regions with reported cases of COVID-19**

278 As of April 6, 2020, a total of 178 countries/regions worldwide had reported data and were  
279 included in this study (Table S1). The three countries/regions with the highest IR worldwide  
280 were Andorra (Southern Europe, IR=313.80), Iceland (Northern Europe, IR=215.90) and  
281 Gibraltar (United Kingdom) (Southern Europe, IR=178.52). The three countries/regions with the  
282 highest CMR worldwide were San Marino (Southern Europe, CMR=947.17), Spain (Southern  
283 Europe, IR=285.53) and Italy (Southern Europe, IR=273.42). The three countries/regions with  
284 the highest DCI worldwide were the United States (North America, DCI=4823.87), Spain  
285 (Southern Europe, DCI=2070.83) and Italy (Southern Europe, DCI=1978.31).

#### 286 **3.2 Spatial clustering evaluation for COVID-19**

##### 287 **3.2.1 Test results for global spatial correlation**

288 The number and distribution of first-order neighbors in different countries/regions are shown in  
289 Figure 2. The number of neighboring countries/regions was mainly concentrated in 0–6,  
290 accounting for 87.08% of the total number of neighboring countries. Among them, China and  
291 Russia had the largest number of neighboring countries/regions.

292 Table S2 shows the global spatial Moran's I indexes of the IR, CMR and DCI of 178  
293 countries/regions worldwide according to the one-order spatial contiguity matrix. The Moran's I  
294 indexes of IR, CMR and DCI were all positive, and all index values were significant at the level  
295 of 1%, thus indicating that the IR, CMR and DCI of 178 countries/regions worldwide had strong  
296 spatial aggregation effects. Meanwhile, the Moran's I index of different indicators showed  
297 significant differences, thus indicating to some extent that IR, CMR and DCI have different  
298 aggregation effects in different countries/regions.

##### 299 **3.2.2 Test results for local spatial correlation**

300 A total of 37 countries/regions were strongly opposite from the IR index "spatial autocorrelation  
301 hypothesis," including 11 countries/regions with high–high patterns, mainly concentrated in  
302 Western Europe, southern Europe and Canada; 24 countries/regions with low–low patterns,  
303 mainly concentrated in parts of Africa, parts of Asia (China, India, Laos); Cuba with a low–high  
304 pattern; and Djibouti with a high–low pattern. Simultaneously, 29 countries/regions were  
305 strongly opposite from the CMR index "spatial autocorrelation hypothesis," which was suitable  
306 for 10 countries with high–high patterns, mainly in Western Europe and southern Europe (e.g.,  
307 France, Italy and Spain); 16 countries/regions with low–low patterns, mainly concentrated in  
308 parts of Africa and China; and three countries with low–high patterns, including Morocco and  
309 Slovenia. In addition, 39 countries/regions strongly did not support the hypothesis of "no spatial  
310 autocorrelation" of the DCI index, among which six countries/regions had high–high patterns  
311 (Canada, France, Portugal, Belgium, the Netherlands, and Switzerland), and 22  
312 countries/regions had low–low patterns, mainly in parts of Africa and Honduras. Eleven



313 countries were in the low–high pattern category, including Mexico, Cuba, Morocco, Denmark  
314 and Luxembourg, etc. The above results are consistent with the global spatial autocorrelation  
315 test results, thus indicating that IR, CMR and DCI indicators in some countries/regions may be  
316 affected by the COVID-19 epidemic in neighboring countries/regions and may show clear  
317 geographical characteristics.

318 To directly reflect the local spatial characteristics of IR, CMR and DCI, LISA scatter diagrams of  
319 the three indexes are shown in Figure 3. Most of the three indicators fell into the third quadrant  
320 (low–low), but the countries/regions whose IR and DCI index fell into the first quadrant (high–  
321 high) and the second quadrant (low–high) had indicator values exceeding the CMR. Thus,  
322 among the 178 countries/regions worldwide, the countries/regions with low IR, CMR and DCI  
323 indicators showed a spatial agglomeration effect, as did the countries/regions with high IR, CMR  
324 and DCI indicators. In addition, some neighboring countries/regions showed some differences in  
325 IR, CMR and DCI (high–low and low–high).

### 326 **3.3 Analysis of the influence of socio-ecological factors on COVID-19 risk**

#### 327 3.3.1 Correlation analysis of socio-economic factors

328 To eliminate the influence of the collinearity between the socio-economic indicators on the  
329 estimation effect of the model, we established a correlation matrix of the socio-economic  
330 indicators (Table S3). The indexes with strong correlation ( $> 0.8$ ) were screened, and one of the  
331 effective indexes was reserved for model analysis. We excluded eight socio-economic  
332 indicators in Table 2, numbered 7 (current health expenditure per capita), 12 (total life  
333 expectancy at birth), 13 (maternal mortality ratio), 14 (infant mortality rate), 17 (access to basic  
334 handwashing facilities including soap and water), 20 (population growth), 21 (proportion of the  
335 population spending more than 10% of household consumption or income on out-of-pocket  
336 health care expenditure) and 26 (technicians in R&D), and we retained 20 socio-economic  
337 indicators.

#### 338 3.3.2 Negative binomial regression analysis of socio-ecological factors on COVID-19 risk

339 We analyzed the effects of socio-ecological factors on COVID-19 risk in 178 countries. The  
340 results of single-factor and multi-factor negative binomial regression analysis are shown in  
341 Table 4.

342 The IR was significantly positively associated with GDP per capita (aIRR=1.029, 95%CI: 1.013–  
343 1.045), use of at least basic sanitation services (aIRR=1.022, 95%CI: 1.005–1.039) and  
344 coverage of social insurance programs (aIRR=1.047, 95%CI: 1.009–1.086), and was  
345 significantly negatively associated with the proportion of the population spending more than 25%  
346 of household consumption or income on out-of-pocket health care expenses (aIRR=0.846,  
347 95%CI: 0.750–0.955) and the poverty headcount ratio at national poverty lines (aIRR=0.970,  
348 95%CI: 0.948–0.993).

349 The CMR was significantly positively associated with urban populations (aIRR=1.027, 95%CI:  
350 1.010–1.044), GDP per capita (aIRR=1.031, 95%CI: 1.021–1.041) and current health  
351 expenditure (aIRR=1.211, 95%CI: 1.040–1.410), and was significantly negatively associated  
352 with the number of hospital beds (aIRR=0.799, 95%CI: 0.696–0.916), number of nurses and  
353 midwives (aIRR=0.837, 95%CI: 0.749–0.936) and poverty headcount ratio at the national  
354 poverty lines (aIRR=0.960, 95%CI: 0.940–0.982).

355 The DCI was significantly positively associated with urban populations (aIRR=1.021, 95%CI:  
356 1.009–1.034), population density (aIRR=1.000, 95%CI: 1.000–1.000) and researchers in R&D  
357 (aIRR=1.000, 95%CI: 1.000–1.001), and was significantly negatively associated with the  
358 number of hospital beds (aIRR=0.731, 95%CI: 0.641–0.833), number of nurses and midwives  
359 (aIRR=0.904, 95%CI: 0.820–0.997) and poverty headcount ratio at the national poverty lines  
360 (aIRR=0.963, 95%CI: 0.945–0.982).

361 The results of the sensitivity analysis are reported in Table S4 and Table S5: we used the  
362 maximum and minimum temperatures instead of the average temperature, and then  
363 incorporated the two climate factors into the single-factor and multi-factor negative binomial  
364 regression. The results showed that the significance of different socio-ecological factors was  
365 essentially consistent. We found that only the variable of poverty headcount ratio at the national  
366 poverty lines (percentage of population) became significant after sensitivity analysis on IR, thus  
367 indicating that the analysis results were relatively reliable.

368

#### 369 **4. Discussion**

370 By evaluating the spatial aggregation characteristics of three indicators—IR, CMR and DCI—on  
371 COVID-19 risk in 178 countries, Western Europe, Southern Europe, East Asia and some African  
372 countries, we found that all showed relatively large spatial correlations, thus indicating that  
373 COVID-19 broadly affects these countries/regions.

374 Because COVID-19 is highly contagious, after an outbreak occurs in a country/region, the virus  
375 tends to spread rapidly in surrounding countries. Italy was the first country in Europe to have a  
376 large outbreak of COVID-19, but the Italian health system adopted several control measures,  
377 such as timely intervention and containment measures brought about by decentralization,  
378 flexible financing mechanisms, private and public sector partnerships, and human resources  
379 mobilization, so that the IR and DCI could be effectively controlled [51]. However, because  
380 some European countries did not perform effective prevention and control measures, such as  
381 blockading countries or cities, in early stages of the outbreak, the epidemic gradually broke out  
382 in countries including France, Germany, Spain and Portugal. In North America, the development  
383 of COVID-19 presents progressive characteristics (high–high and low–high mode), and Canada  
384 is also significantly affect clearly the United States by the COVID–19 outbreak, but the DCI in  
385 Mexico and other countries/regions in Central America remained relatively low. The United  
386 States also recently closed its border with Canada and Mexico and decreased the flow of  
387 people across the border. Because, blockading and quarantining provide very good protection,  
388 taking these measures in countries or cities is very important to decrease the risk of COVID-19  
389 multinational spread. The potential transmission of COVID-19 in South America must not be  
390 ignored.

391 Second, both IR and CMR presented low–low patterns in China, thus indicating that China and  
392 some neighboring countries (such as South Korea and Singapore) have effectively reduced the  
393 risk to neighboring countries by implementing strong prevention and control measures against  
394 COVID-19 transmission and have also acquired valuable experience useful to other countries in  
395 fighting COVID-19 virus [52–56]. However, notably, the IR of COVID-19 in India presents a low–  
396 low model, thus indicating that India is at low risk of COVID-19 transmission from surrounding  
397 countries, and consequently has a low DCI. However, as the world's second most populous  
398 country, India may have a high risk of COVID-19 transmission because of inadequate medical  
399 conditions and detection levels. Simultaneously, China, South Korea and other countries must

400 strengthen screening of imported cases from other countries, reduce social contact among  
401 travelers and prevent the possible secondary transmission of COVID-19 [52,57,58].

402 Third, most countries/regions in Africa remain in a low–low mode, but the short distance and  
403 frequent contacts between Western and Southern Europe and North Africa may place North  
404 Africa at high risk of COVID-19 spread; Morocco currently has a low–high mode representing an  
405 early warning, and COVID-19 viruses must further be prevented from entering other parts of  
406 Africa. Although African countries took measures to prevent the Ebola outbreak in 2014, Africa  
407 remains one of the poorest countries worldwide, and it has a shortage of health resources to  
408 quickly control the outbreak. Studies have shown that the current spread of COVID-19 in West  
409 Africa urgently requires action to control the further spread of COVID-19 and improve the  
410 response capacity of affected countries in West Africa [59]. Although most parts of Africa are in  
411 the low–low mode, they may also face threats. Many COVID-19 cases may be undetected, thus  
412 potentially explaining the current low-level indicators (IR, CMR and DCI).

413 We found that, in terms of urban development, both CMR and DCI were significantly positive  
414 associated with the urban population (percentage home of total population), and people per sq.  
415 km of land area had significant positive effects on the DCI. Non-drug intervention measures  
416 have already been implemented, and if traffic restrictions, social isolation and family measures  
417 are not ensured, the increase in population density and urbanization may result in many  
418 problems, such as public traffic, rural population health inequities, poor housing conditions,  
419 inadequate freshwater supply, and poor sanitation and ventilation systems, thus accelerating  
420 the spread of the COVID-19 virus, in agreement with previous research [60,61]. The higher the  
421 urban population (percentage of total population), the faster the urbanization process of the  
422 country/region; consequently, aging and young people participating in social activities become  
423 more likely to aggravate the spread of the virus and increase the burden on the health system,  
424 in agreement with the results of one study [62]. In addition, studies have shown that, with  
425 urbanization, the risk of infection and the chances of survival after COVID-19 infection among  
426 older individuals with complications is greatly increased, thus resulting in a significant increase  
427 in the CMR in the country/region [63–64].

428 In terms of the economy and growth, we found that GDP per capita (current 1,000 US\$) was  
429 significantly positive associated with the IR and CMR of COVID-19, possibly because the GDP  
430 per capita tends to reflect a country's economic development level: with higher GDP per capita,  
431 governments can invest more in screening and treatment of patients with mild and severe cases  
432 of COVID-19. Consequently, with more confirmed cases and deaths, classification strategies  
433 can be considered for COVID-19 in low-income groups. Especially in economically  
434 underdeveloped areas such as Africa, similar symptoms can be used as a basis to implement a  
435 series of diagnostic tests [65]. This method of raising clinical diagnostic standards was used in  
436 Wuhan, China.

437 In terms of health, we found that increasing the proportion of residents using at least basic  
438 sanitation services was significantly positive associated with the IR of COVID-19. For example,  
439 improving basic sanitation services and increasing contact between primary health workers and  
440 potential and diagnosed COVID-19 patients is very important. In particular, the government of  
441 Wuhan, China implemented nucleic acid testing on each resident via hospitals and primary  
442 health workers, thus enabling COVID-19 detection in a larger proportion and facilitating rapid  
443 control of COVID-19 risk transmission. Second, the numbers of hospital beds (per 1,000 people),  
444 nurses and midwives (per 1,000 people) were significantly negative associated with the IR and  
445 CMR of COVID-19, thus suggesting that COVID-19 risk should be controlled, and the number of  
446 hospital beds and nurses should be increased in a short period of time. The increase in the  
447 numbers of hospital beds and nurses can help achieve standardized management of patients

448 and allow more medical resources to be concentrated on the treatment of severe cases. Some  
449 research has shown that some countries, such as Italy, China and the United States, have  
450 established Fangcang shelter hospitals or field hospitals and increased the numbers of regular  
451 hospital beds, intensive care beds and medical workers (by transferring resources from other  
452 regions and the military), reopened closed hospitals, and considered use of medical volunteers  
453 in the treatment of mild and severe COVID-19 cases; these measures are effective ways to  
454 reduce the IR and CMR [66, 67]. Third, among people infected with COVID-19, the proportion of  
455 the population spending more than 25% of household consumption or income on out-of-pocket  
456 health care expenses were significantly negative associated with the IR, whereas coverage with  
457 social insurance plans positively influences the IR. Higher income, enhanced health insurance  
458 coverage and decreased burden of medical treatment significantly increase the IR, thus  
459 suggesting that governments and health insurance providers should cooperate in the prevention  
460 and control of COVID-19. In addition to financial subsidies, the government should also reduce  
461 or grant exemptions for patient co-payments, to increase the possibility of COVID-19 patients  
462 receiving testing and treatment.

463 In science and technology, the number of researchers in R&D (per million people) was  
464 significantly positive associated with the DCI. This improvement includes facilitating health  
465 science and technology input, strengthening basic life science research, fostering international  
466 cooperation between science and technology (such as in the development and use of effective  
467 drugs), providing more convenient testing technology, shortening testing times, expanding the  
468 scale of detection, improving treatment technology and performing ongoing vaccine  
469 development to reduce present and future COVID-19 transmission. In addition, the poverty  
470 headcount ratio at the national poverty lines (percentage of population) was significantly  
471 negative associated with the IR, CMR and DCI. Increases in the population in poverty and in  
472 racial discrimination greatly diminish accessibility to medical services. Government and society  
473 must address these problems through economic stimulus plans, unemployment relief programs,  
474 welfare and health safeguarding measures, and plans to decrease health spending by these  
475 groups [68].

476 We also found that climatic factors (temperature, RH, precipitation and wind speed) were not  
477 significantly associated with COVID-19 risk, in agreement with the results of some studies [69].  
478 However, previous studies have primarily considered the effects of single climate factors, thus  
479 potentially affecting the estimates of the results [70–72]. There is no sufficient evidence  
480 indicating that climate factors have specific effects on the spread of COVID-19. This study also  
481 shows that in the measurement of COVID-19 risk, the influences of other factors should be  
482 considered—such as the constraints of economic development, transportation and other  
483 factors—to improve understanding of the mechanisms underlying interrelationships among  
484 factors.

485

## 486 **5. Limitations**

487 This study has several limitations. First, we selected cross-sectional data for spatial analysis  
488 and regression modeling; therefore, the results may not reflect more changes in time, thus  
489 potentially decreasing the statistical ability to detect the relationships among various factors and  
490 COVID-19 risk. Second, owing to data matching across databases, some aspects of  
491 country/region data may have been lost, thus potentially affecting the spatial weight matrix  
492 estimation and regression modeling results. Third, because of the socio-ecological study design,  
493 we were unable to access data at the individual level, such as age, sex, occupation, economic  
494 and health status, and the actual exposure temperature of each person. However, future studies

495 could adopt hybrid study designs, which use individual-level data from subpopulations to  
496 improve ecological extrapolation.

497

## 498 **6. Conclusion**

499 By using the data from 178 countries/regions, we found that socio-economic factors can  
500 significantly reduce the risk of COVID-19. As a next step in COVID-19 prevention, different  
501 countries/regions should focus on controlling urban populations, providing economic subsidies  
502 and medical resource supplies, and taking broad views of social welfare. Strategies may include  
503 population isolation, travel restrictions, case screening, cross-regional or national science and  
504 technology exchange to promote diagnosis and treatment, public welfare policy improvement,  
505 as well as decreasing the burden of low-income groups in obtaining medical treatment.  
506 Simultaneously, we must be alert to the COVID-19 risk in some countries in Africa and Asia,  
507 and must curb the second wave of COVID-19 transmission.

508

509

## 510 **Acknowledgments**

511 The authors would like to thank the National Natural Science Foundation of China and the  
512 National School of Development, Peking University, University of Michigan, and other members  
513 for their support and cooperation. We would also like to thank the study samples from The  
514 Center for Systems Science and Engineering, Johns Hopkins University (JHU-CSSE), Global  
515 Surface Summary of the Day (GSOD) from the Integrated Surface Hourly (ISH) dataset and  
516 World Development Indicators (WDI) dataset for providing the information in our research.

517

## 518 **Contributors**

519 DS, XZ contributed to the conception and design of the project; DS, TZ, KH, XZ contributed to  
520 the analysis and interpretation of the data; MT, YZ contributed to the data acquisition and  
521 provided statistical analysis support; DS drafted the article. DS and XZ are the guarantors. The  
522 corresponding author attests that all listed authors meet authorship criteria and that no others  
523 meeting the criteria have been omitted.

524

## 525 **Funding**

526 This study was funded by National Natural Science Foundation of China (No. 71473096; No.  
527 71673101; No. 71974066) and Michigan Institute for Clinical and Health Research (MICHHR No.  
528 UL1TR002240).

529

## 530 **Declaration of interests**

531 All other authors declare no competing interests.

532

### 533 **Patient and public involvement**

534 This research was done without patient involvement. Patients were not invited to comment on  
535 the study design and were not consulted to develop patient relevant outcomes or interpret the  
536 results. Patients were not invited to contribute to the writing or editing of this document for  
537 readability or accuracy.

538

### 539 **Patient consent for publication**

540 Not required.

541

### 542 **Ethics approval**

543 This study was approved by the Ethics Committee of the Tongji Medical College, Huazhong  
544 University of Science and Technology (IORG No: IORG0003571).

545

### 546 **Data sharing statement**

547 The data used for the analyses are publicly available from the Johns Hopkins University Center  
548 for Systems Science and Engineering (<https://github.com/CSSEGISandData/COVID-19>), the  
549 World Bank (<https://datacatalog.worldbank.org/dataset/world-development-indicators>) and  
550 National Oceanic and Atmospheric Administration, Department of Commerce  
551 (<https://catalog.data.gov/dataset/global-surface-summary-of-the-day-gsod>).

552

553

### 554 **References**

555 [1] Cleaveland, S., M. K. Laurenson, and L. H. Taylor. "Diseases of humans and their domestic  
556 mammals: pathogen characteristics, host range and the risk of emergence." *Philosophical*  
557 *Transactions of the Royal Society of London. Series B: Biological Sciences* 356.1411 (2001):  
558 991-999.

559 [2] Halliday, Jo EB, et al. "Driving improvements in emerging disease surveillance through  
560 locally relevant capacity strengthening." *Science* 357.6347 (2017): 146-148.

561 [3] Schneider, Maria Cristina, and Gustavo Machado. "Environmental and socioeconomic  
562 drivers in infectious disease." *The Lancet Planetary Health* 2.5 (2018): e198-e199.

563 [4] Daszak, Peter, Andrew A. Cunningham, and Alex D. Hyatt. "Emerging infectious diseases of  
564 wildlife--threats to biodiversity and human health." *science* 287.5452 (2000): 443-449.

565 [5] Weiss, Robin A., and Anthony J. McMichael. "Social and environmental risk factors in the  
566 emergence of infectious diseases." *Nature medicine* 10.12 (2004): S70-S76.

- 567 [6] Woolhouse, Mark EJ, and Sonya Gowtage-Sequeria. "Host range and emerging and  
568 reemerging pathogens." *Emerging infectious diseases* 11.12 (2005): 1842.
- 569 [7] Patz, Jonathan A., et al. "Unhealthy landscapes: policy recommendations on land use  
570 change and infectious disease emergence." *Environmental health perspectives* 112.10 (2004):  
571 1092-1098.
- 572 [8] Kuhn, K., et al. "Using climate to predict infectious disease outbreaks: A review." *World  
573 Health Organization* (2004).
- 574 [9] Wu, XiaoXu, et al. "Impact of global change on transmission of human infectious diseases."  
575 *Science China Earth Sciences* 57.2 (2014): 189-203.
- 576 [10] Hamrick, Patricia Najera, et al. "Geographic patterns and environmental factors associated  
577 with human yellow fever presence in the Americas." *PLoS neglected tropical diseases* 11.9  
578 (2017): e0005897.
- 579 [11] Muñoz-Zanzi, Claudia, et al. "Leptospira contamination in household and environmental  
580 water in rural communities in southern Chile." *International journal of environmental research  
581 and public health* 11.7 (2014): 6666-6680.
- 582 [12] Semenza, Jan C., et al. "Linking environmental drivers to infectious diseases: the European  
583 environment and epidemiology network." *PLoS neglected tropical diseases* 7.7 (2013).
- 584 [13] Froment, A., et al. "Biodiversity and health: the place of parasitic and infectious diseases.  
585 Biodiversity change and human health." (2009): 211-227.
- 586 [14] Yang, Hyun M., and Marcelo U. Ferreira. "Assessing the effects of global warming and local  
587 social and economic conditions on the malaria transmission." *Revista de saude publica* 34.3  
588 (2000): 214-222.
- 589 [15] Martens, Pim, and Susanne C. Moser. "Health impacts of climate change." *Science*  
590 292.5519 (2001): 1065-1066.
- 591 [16] McMichael, Anthony J., and Rosalie E. Woodruff. "Detecting the health effects of  
592 environmental change: scientific and political challenge." (2005): 1-3.
- 593 [17] Casman, Elizabeth A., and Hadi Dowlatabadi, eds. *The contextual determinants of malaria.*  
594 *Resources for the Future*, 2002.
- 595 [18] Tol, Richard SJ, and Hadi Dowlatabadi. "Vector-borne diseases, development & climate  
596 change." *Integrated Assessment* 2.4 (2001): 173-181.
- 597 [19] Epstein, Paul R. "Climate change and emerging infectious diseases." *Microbes and  
598 infection* 3.9 (2001): 747-754.
- 599 [20] Wu, Xiaoxu, et al. "Impact of climate change on human infectious diseases: Empirical  
600 evidence and human adaptation." *Environment international* 86 (2016): 14-23.
- 601 [21] Wu, XiaoXu, et al. "Impact of global change on transmission of human infectious diseases."  
602 *Science China Earth Sciences* 57.2 (2014): 189-203.

- 603 [22] Parham, Paul E., and Edwin Michael. "Outbreak properties of epidemic models: The roles  
604 of temporal forcing and stochasticity on pathogen invasion dynamics." *Journal of theoretical*  
605 *biology* 271.1 (2011): 1-9.
- 606 [23] Turell, Michael J., Lee W. Cohnstaedt, and William C. Wilson. "Effect of Environmental  
607 Temperature on the Ability of *Culex tarsalis* and *Aedes taeniorhynchus* (Diptera: Culicidae) to  
608 Transmit Rift Valley Fever Virus." *Vector-Borne and Zoonotic Diseases* (2020).
- 609 [24] Kioutsioukis, Ioannis, and Nikolaos I. Stilianakis. "Assessment of West Nile virus  
610 transmission risk from a weather-dependent epidemiological model and a global sensitivity  
611 analysis framework." *Acta tropica* 193 (2019): 129-141.
- 612 [25] Peci, Adriana, et al. "Effects of absolute humidity, relative humidity, temperature, and wind  
613 speed on influenza activity in Toronto, Ontario, Canada." *Appl. Environ. Microbiol.* 85.6 (2019):  
614 e02426-18.
- 615 [26] Sung, Minki, et al. "Airflow as a Possible Transmission Route of Middle East Respiratory  
616 Syndrome at an Initial Outbreak Hospital in Korea." *International journal of environmental*  
617 *research and public health* 15.12 (2018): 2757.
- 618 [27] Huang, Chaolin, et al. "Clinical features of patients infected with 2019 novel coronavirus in  
619 Wuhan, China." *The Lancet* 395.10223 (2020): 497-506.
- 620 [28] Chen, Nanshan, et al. "Epidemiological and clinical characteristics of 99 cases of 2019  
621 novel coronavirus pneumonia in Wuhan, China: a descriptive study." *The Lancet* 395.10223  
622 (2020): 507-513.
- 623 [29] Wang, Dawei, et al. "Clinical characteristics of 138 hospitalized patients with 2019 novel  
624 coronavirus–infected pneumonia in Wuhan, China." *Jama* (2020).
- 625 [30] Guan, Wei-jie, et al. "Clinical characteristics of coronavirus disease 2019 in China." *New*  
626 *England Journal of Medicine* (2020).
- 627 [31] Liu, Ying, et al. "The reproductive number of COVID-19 is higher compared to SARS  
628 coronavirus." *Journal of travel medicine* (2020).
- 629 [32] Parham, Paul E., et al. "Understanding and modelling the impact of climate change on  
630 infectious diseases—progress and future challenges." *Climate Change—Socioeconomic Effects*  
631 (2011).
- 632 [33] Caldwell, John C. "Rethinking the African AIDS epidemic." *Population and development*  
633 *review* 26.1 (2000): 117-135.
- 634 [34] Butler, Colin. "HIV and AIDS, poverty, and causation." *The Lancet* 356.9239 (2000): 1445-  
635 1446.
- 636 [35] Auvert, Betran, et al. "Ecological and individual level analysis of risk factors for HIV infection  
637 in four urban populations in sub-Saharan Africa with different levels of HIV infection." *Aids* 15  
638 (2001): S15-S30.
- 639 [36] Weiss, Robin A., and Anthony J. McMichael. "Social and environmental risk factors in the  
640 emergence of infectious diseases." *Nature medicine* 10.12 (2004): S70-S76.



- 641 [37] Houéto, D. "The social determinants of emerging infectious diseases in Africa." *MOJ Public*  
642 *Health* 8.2 (2019): 57-63.
- 643 [38] Wu, Xiaoxu, et al. "Impact of climate change on human infectious diseases: Empirical  
644 evidence and human adaptation." *Environment international* 86 (2016): 14-23.
- 645 [39] Kovats, Sari, et al. *Climate change and human health: impact and adaptation*. World Health  
646 Organization (WHO), 2000.
- 647 [40] Houéto, D. "The social determinants of emerging infectious diseases in Africa." *MOJ Public*  
648 *Health* 8.2 (2019): 57-63.
- 649 [41] Parham, Paul E., et al. "Climate, environmental and socio-economic change: weighing up  
650 the balance in vector-borne disease transmission." *Philosophical Transactions of the Royal*  
651 *Society B: Biological Sciences* 370.1665 (2015): 20130551.
- 652 [42] Zhang S, Diao M Y, Yu W, et al. Estimation of the reproductive number of Novel  
653 Coronavirus (COVID-19) and the probable outbreak size on the Diamond Princess cruise ship:  
654 A data-driven analysis[J]. *International Journal of Infectious Diseases*, 2020, 93: 201-204.
- 655 [43] Li, Qun, et al. "Early transmission dynamics in Wuhan, China, of novel coronavirus–infected  
656 pneumonia." *New England Journal of Medicine* (2020).
- 657 [44] Xie X, Zhong Z, Zhao W, et al. Chest CT for typical 2019-nCoV pneumonia: relationship to  
658 negative RT-PCR testing[J]. *Radiology*, 2020: 200343.
- 659 [45] Dong, Ensheng, Hongru Du, and Lauren Gardner. "An interactive web-based dashboard to  
660 track COVID-19 in real time." *The Lancet Infectious Diseases* (2020).
- 661 [46] Chen, Biqing, et al. "Roles of meteorological conditions in COVID-19 transmission on a  
662 worldwide scale." *medRxiv* (2020).
- 663 [47] Anselin, Luc. "A local indicator of multivariate spatial association: extending Geary's C." *Geographical Analysis* 51.2 (2019): 133-150.
- 665 [48] Elhorst, J. Paul, Donald J. Lacombe, and Gianfranco Piras. "On model specification and  
666 parameter space definitions in higher order spatial econometric models." *Regional Science and*  
667 *Urban Economics* 42.1-2 (2012): 211-220.
- 668 [49] Phung, Dung, et al. "The effects of socioecological factors on variation of communicable  
669 diseases: A multiple-disease study at the national scale of Vietnam." *PloS one* 13.3 (2018).
- 670 [50] Hondula, David M., and Adrian G. Barnett. "Heat-related morbidity in Brisbane, Australia:  
671 spatial variation and area-level predictors." *Environmental health perspectives* 122.8 (2014):  
672 831-836.
- 673 [51] Armocida, Benedetta, et al. "The Italian health system and the COVID-19 challenge." *The*  
674 *Lancet Public Health* (2020).
- 675 [52] Leung, Kathy, et al. "First-wave COVID-19 transmissibility and severity in China outside  
676 Hubei after control measures, and second-wave scenario planning: a modelling impact  
677 assessment." *The Lancet* (2020).

- 678 [53] Kraemer, Moritz UG, et al. "The effect of human mobility and control measures on the  
679 COVID-19 epidemic in China." *Science* (2020).
- 680 [54] Chinazzi, Matteo, et al. "The effect of travel restrictions on the spread of the 2019 novel  
681 coronavirus (COVID-19) outbreak." *Science* (2020).
- 682 [55] Prem, Kiesha, et al. "The effect of control strategies to reduce social mixing on outcomes of  
683 the COVID-19 epidemic in Wuhan, China: a modelling study." *The Lancet Public Health* (2020).
- 684 [56] Koo, Joel R., et al. "Interventions to mitigate early spread of SARS-CoV-2 in Singapore: a  
685 modelling study." *The Lancet Infectious Diseases* (2020).
- 686 [57] Xu, Shunqing, and Yuanyuan Li. "Beware of the second wave of COVID-19." *The Lancet*  
687 (2020).
- 688 [58] Niehus, Rene, et al. "Using observational data to quantify bias of traveller-derived COVID-  
689 19 prevalence estimates in Wuhan, China." *The Lancet Infectious Diseases* (2020).
- 690 [59] Martinez-Alvarez, Melisa, et al. "COVID-19 pandemic in west Africa." *The Lancet Global*  
691 *Health* (2020).
- 692 [60] Lee, Vernon J., et al. "Epidemic preparedness in urban settings: new challenges and  
693 opportunities." *The Lancet Infectious Diseases* (2020).
- 694 [61] Dowd, Jennifer Beam, et al. "Demographic science aids in understanding the spread and  
695 fatality rates of COVID-19." *medRxiv* (2020).
- 696 [62] Sajadi, Mohammad M. and Habibzadeh, Parham and Vintzileos, Augustin and Shokouhi,  
697 Shervin and Miralles-Wilhelm, Fernando and Amoroso, Anthony, Temperature, Humidity and  
698 Latitude Analysis to Predict Potential Spread and Seasonality for COVID-19 (March 5, 2020).  
699 Available at SSRN: <https://ssrn.com/abstract=3550308> or  
700 <http://dx.doi.org/10.2139/ssrn.3550308>
- 701 [63] Ruan, Shigui. "Likelihood of survival of coronavirus disease 2019." *The Lancet Infectious*  
702 *Diseases* (2020).
- 703 [64] Fang, Lei, George Karakiulakis, and Michael Roth. "Are patients with hypertension and  
704 diabetes mellitus at increased risk for COVID-19 infection?." *The Lancet. Respiratory Medicine*  
705 (2020).
- 706 [65] Ayebare, Rodgers R., et al. "Adoption of COVID-19 triage strategies for low-income  
707 settings." *The Lancet Respiratory Medicine* (2020).
- 708 [66] Chen, Simiao, et al. "Fangcang shelter hospitals: a novel concept for responding to public  
709 health emergencies." *The Lancet* (2020).
- 710 [67] Miani, Alessandro, et al. "The Italian war-like measures to fight coronavirus spreading: Re-  
711 open closed hospitals now." *EClinicalMedicine* (2020).
- 712 [68] McCloskey, Brian, et al. "Mass gathering events and reducing further global spread of  
713 COVID-19: a political and public health dilemma." *Lancet* (London, England) 395.10230 (2020):  
714 1096.

715 [69] Yao, Y., Pan, J., Liu, Z., Meng, X., Wang, W., Kan, H., & Wang, W. (2020). No Association  
 716 of COVID-19 transmission with temperature or UV radiation in Chinese cities. The European  
 717 respiratory journal, 2000517. Advance online publication.  
 718 <https://doi.org/10.1183/13993003.00517-2020>

719 [70] Islam, Nazrul, Sharmin Shabnam, and A. Mesut Erzurumluoglu. "Meteorological factors and  
 720 Covid-19 incidence in 310 regions across the world." medRxiv (2020).

721 [71] Zhu, Yongjian, and Jingui Xie. "Association between ambient temperature and COVID-19  
 722 infection in 122 cities from China." Science of The Total Environment (2020): 138201.

723 [72] Wang, Mao, et al. "Temperature significant change COVID-19 Transmission in 429 cities."  
 724 medRxiv (2020).

725 Tables and Figures

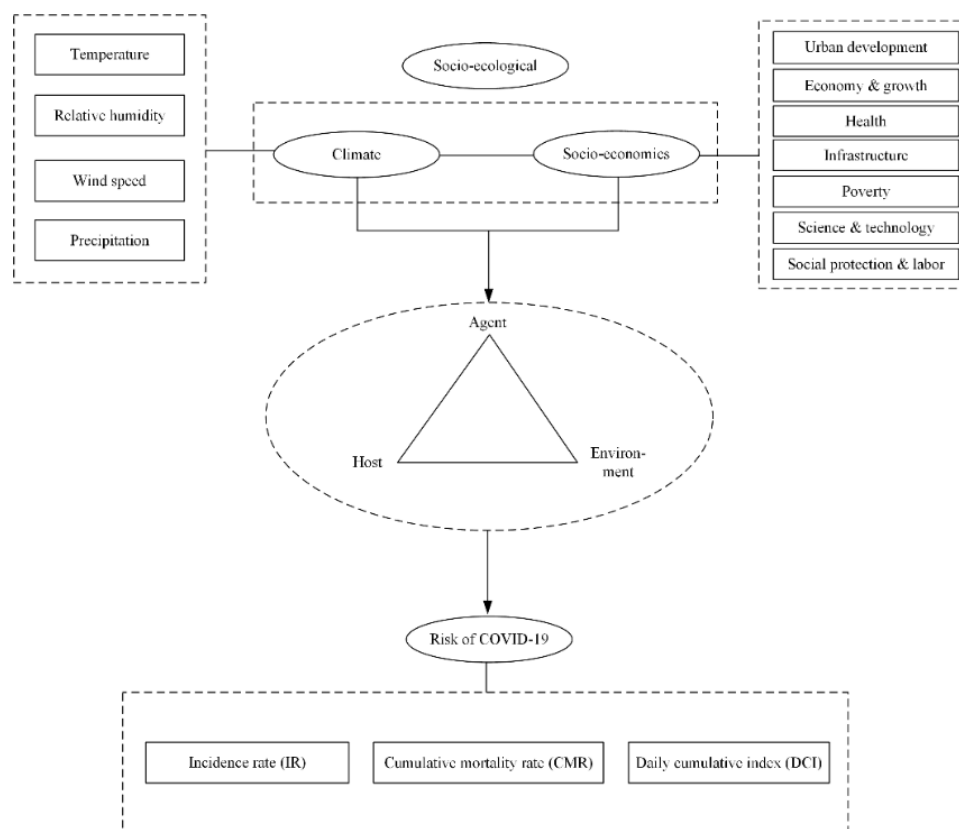

726  
 727 **Figure 1. Climate, socio-economic conditions and COVID-19 transmission**  
 728

**Table 1 The calculation process of outcome variables for COVID-19**

| Outcome variables               | Calculation process                                                                                                                                       |
|---------------------------------|-----------------------------------------------------------------------------------------------------------------------------------------------------------|
| Incidence rate (IR)             | $IR = \frac{\text{Number of new cases of COVID-19 in a given time period}}{\text{Total population at risk during the follow-up period}} \times 1,000,000$ |
| Cumulative mortality rate (CMR) | $CMR = \frac{\text{number of COVID-19 deaths in a given time period}}{\text{total population during a given time period}} \times 1,000,000$               |

|                              |                                                                                                                            |
|------------------------------|----------------------------------------------------------------------------------------------------------------------------|
| Daily cumulative index (DCI) | $DCI = \frac{\text{cumulative COVID-19 confirmed cases}}{\text{number of days between the first reported case until now}}$ |
|------------------------------|----------------------------------------------------------------------------------------------------------------------------|

729

**Table 2. Socioeconomic indicators influencing the spread of COVID-19**

| Dimensions                | Indicators                                                                                                                   | No.                                                                 |      |
|---------------------------|------------------------------------------------------------------------------------------------------------------------------|---------------------------------------------------------------------|------|
| Urban Development         | Urban population (% of total population)                                                                                     | (1)                                                                 |      |
|                           | Urban population growth (annual %)                                                                                           | (2)                                                                 |      |
|                           | Population density (people per sq. km of land area)                                                                          | (3)                                                                 |      |
| Economy & Growth          | GDP per capita (current US\$)                                                                                                | (4)                                                                 |      |
| Health                    | People using at least basic sanitation services (% of population)                                                            | (5)                                                                 |      |
|                           | Current health expenditure (% of GDP)                                                                                        | (6)                                                                 |      |
|                           | Current health expenditure per capita (current US\$)                                                                         | (7)                                                                 |      |
|                           | Death rate, crude (per 1,000 people)                                                                                         | (8)                                                                 |      |
|                           | Domestic private health expenditure (% of current health expenditure)                                                        | (9)                                                                 |      |
|                           | Domestic private health expenditure per capita (current US\$)                                                                | (10)                                                                |      |
|                           | Hospital beds (per 1,000 people)                                                                                             | (11)                                                                |      |
|                           | Life expectancy at birth, total (years)                                                                                      | (12)                                                                |      |
|                           | Maternal mortality ratio (national estimate, per 100,000 live births)                                                        | (13)                                                                |      |
|                           | Mortality rate, infant (per 1,000 live births)                                                                               | (14)                                                                |      |
|                           | Net migration                                                                                                                | (15)                                                                |      |
|                           | Nurses and midwives (per 1,000 people)                                                                                       | (16)                                                                |      |
|                           | People with basic handwashing facilities including soap and water (% of population)                                          | (17)                                                                |      |
|                           | Physicians (per 1,000 people)                                                                                                | (18)                                                                |      |
|                           | Population aged 65 and above (% of total population)                                                                         | (19)                                                                |      |
|                           | Population growth (annual %)                                                                                                 | (20)                                                                |      |
|                           | Proportion of population spending more than 10% of household consumption or income on out-of-pocket health care expenses (%) | (21)                                                                |      |
|                           | Proportion of population spending more than 25% of household consumption or income on out-of-pocket health care expenses (%) | (22)                                                                |      |
|                           | Infrastructure                                                                                                               | Railways, passengers carried (million passenger-km)                 | (23) |
|                           | Poverty                                                                                                                      | Poverty headcount ratio at national poverty lines (% of population) | (24) |
|                           | Science & Technology                                                                                                         | Researchers in R&D (per million people)                             | (25) |
|                           |                                                                                                                              | Technicians in R&D (per million people)                             | (26) |
| Social Protection & Labor | Coverage of social insurance programs (% of population)                                                                      | (27)                                                                |      |
|                           | Unemployment, total (% of total labor force) (national estimate)                                                             | (28)                                                                |      |

730

731

**Table 3 Characteristics of UN geographical divisions with reported cases of COVID-19 as of 6 April 2020**

| UN geographical divisions | No. of Countries/regions | IR†  | CMR‡ | DCI§  | Total population | Total days since first reported case |
|---------------------------|--------------------------|------|------|-------|------------------|--------------------------------------|
| Africa                    |                          |      |      |       |                  |                                      |
| Eastern Africa            | 17                       | 0.18 | 0.04 | 2.85  | 451173502        | 325                                  |
| Middle Africa             | 8                        | 0.12 | 0.21 | 4.96  | 168910830        | 189                                  |
| Northern Africa           | 5                        | 1.92 | 1.85 | 25.03 | 194924933        | 179                                  |

|                           |    |       |        |         |            |     |
|---------------------------|----|-------|--------|---------|------------|-----|
| Southern Africa           | 3  | 0.50  | 0.21   | 26.28   | 62482003   | 65  |
| Western Africa            | 13 | 0.35  | 0.16   | 4.93    | 343169384  | 299 |
| Asia                      |    |       |        |         |            |     |
| Central Asia              | 3  | 4.55  | 0.21   | 19.63   | 57547699   | 68  |
| East Asia                 | 4  | 0.40  | 2.29   | 355.28  | 1574064564 | 273 |
| Southeast Asia            | 9  | 1.47  | 0.78   | 26.75   | 600191804  | 525 |
| Southern Asia             | 9  | 2.18  | 2.09   | 159.97  | 1896189013 | 436 |
| Western Asia              | 14 | 11.32 | 1.67   | 36.21   | 138585525  | 586 |
| Europe                    |    |       |        |         |            |     |
| Eastern Europe            | 10 | 6.91  | 1.85   | 64.50   | 292450026  | 379 |
| Northern Europe           | 12 | 51.86 | 60.72  | 153.93  | 104678611  | 528 |
| Southern Europe           | 14 | 64.24 | 204.80 | 535.26  | 148744007  | 541 |
| Western Asia              | 1  | 38.24 | 7.88   | 1119.15 | 82319724   | 27  |
| Western Europe            | 9  | 57.69 | 77.55  | 628.85  | 196616151  | 442 |
| North America             |    |       |        |         |            |     |
| Caribbean                 | 16 | 3.35  | 2.99   | 7.62    | 38841019   | 338 |
| Central America           | 8  | 2.86  | 1.03   | 24.87   | 175471759  | 203 |
| North America             | 4  | 83.30 | 30.53  | 2027.60 | 364346283  | 189 |
| Oceania                   |    |       |        |         |            |     |
| Australia and New Zealand | 2  | 5.92  | 1.37   | 62.19   | 29877869   | 111 |
| Melanesia                 | 5  | 0.49  | 0.00   | 1.92    | 22465856   | 106 |
| South America             | 12 | 4.74  | 2.39   | 74.46   | 423398995  | 367 |

†IR, incidence rate (per 10 million people).

‡CMR, cumulative mortality rate (per 10 million people).

§DCI, daily cumulative index (%)

732

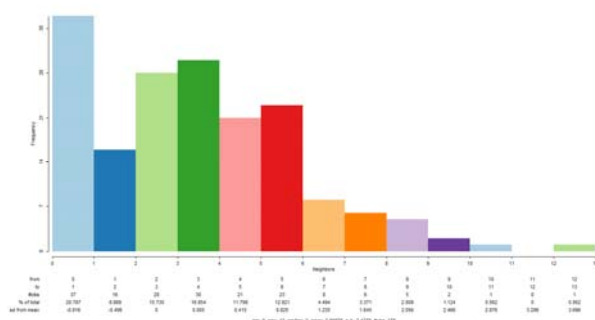

733

734 **Figure 2. Number of first-order neighbors in different countries/regions**

735

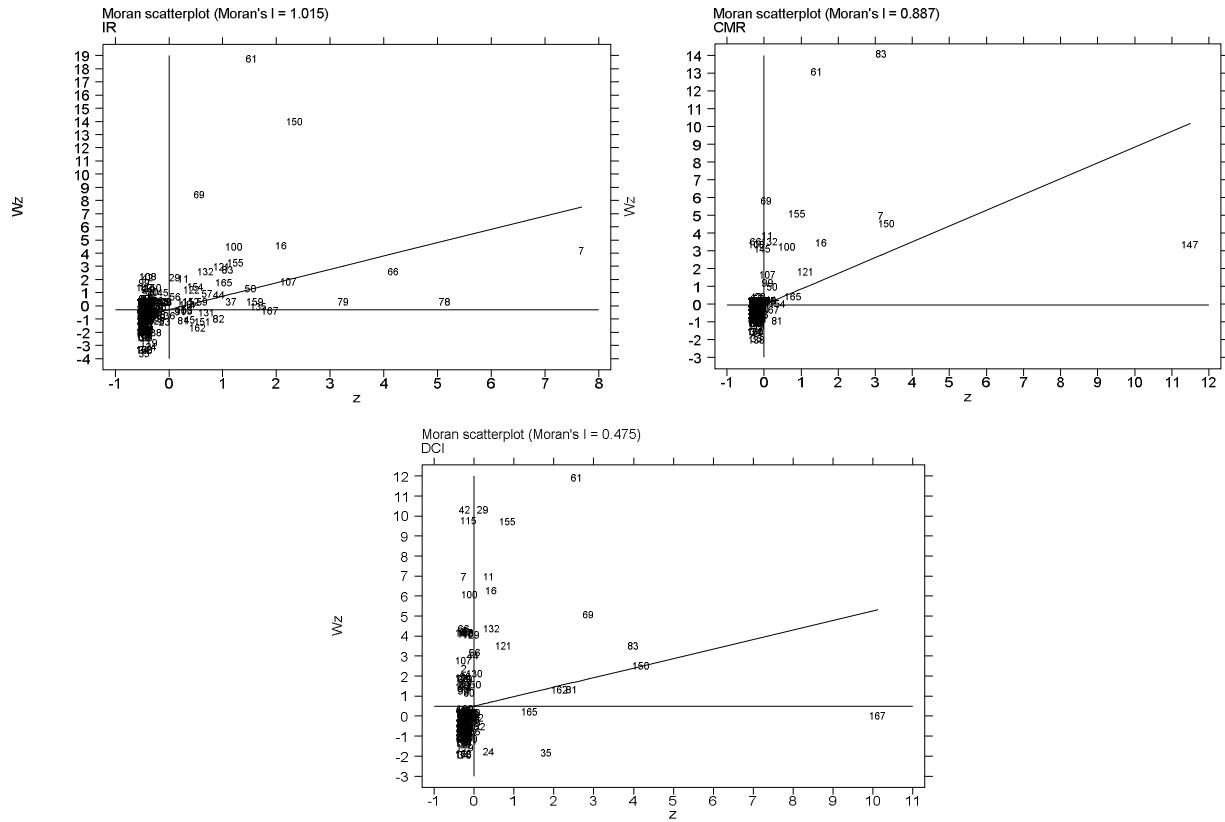

736

737

738 **Figure 3. LISA scatter diagram of IR, CMR and DCI indexes for COVID-19 in 178 countries/regions**

739 (z is the value of the variable, and Wz is the local Moran's I value of the variable.)

740

741

742

743

**Table 4. The results of single-factor and multi-factor negative binomial regression analysis for COVID-19 in 178 countries/regions**

| Indicators                                                                                                                      | Incidence rate (IR) |                   |                  |         |       |                  |                  |         | Cumulative mortality rate (CMR) |                  |                  |         |       |                  |                  |         | Daily cumulative index (DCI) |                  |                  |         |       |                  |                  |         |
|---------------------------------------------------------------------------------------------------------------------------------|---------------------|-------------------|------------------|---------|-------|------------------|------------------|---------|---------------------------------|------------------|------------------|---------|-------|------------------|------------------|---------|------------------------------|------------------|------------------|---------|-------|------------------|------------------|---------|
|                                                                                                                                 | IRR*                | 95%CI†<br>(Lower) | 95%CI<br>(Upper) | p-value | aIRR‡ | 95%CI<br>(Lower) | 95%CI<br>(Upper) | p-value | IRR                             | 95%CI<br>(Lower) | 95%CI<br>(Upper) | p-value | aIRR  | 95%CI<br>(Lower) | 95%CI<br>(Upper) | p-value | IRR                          | 95%CI<br>(Lower) | 95%CI<br>(Upper) | p-value | aIRR  | 95%CI<br>(Lower) | 95%CI<br>(Upper) | p-value |
| <b>Urban Development</b>                                                                                                        |                     |                   |                  |         |       |                  |                  |         |                                 |                  |                  |         |       |                  |                  |         |                              |                  |                  |         |       |                  |                  |         |
| Urban population (% of total population)                                                                                        | 1.048               | 0.992             | 1.106            | 0.096   |       |                  |                  |         | 1.055                           | 1.027            | 1.083            | <0.001  | 1.027 | 1.010            | 1.044            | 0.001   | 1.073                        | 1.055            | 1.091            | <0.001  | 1.022 | 1.010            | 1.034            | <0.001  |
| Urban population growth (annual %)                                                                                              | 1.053               | 1.039             | 1.066            | <0.001  | 0.866 | 0.670            | 1.120            | 0.273   | 0.287                           | 0.203            | 0.405            | <0.001  | 0.751 | 0.507            | 1.111            | 0.153   | 0.407                        | 0.312            | 0.530            | <0.001  | 0.993 | 0.734            | 1.343            | 0.963   |
| Population density (people per sq. km of land area)                                                                             | 1.000               | 1.000             | 1.000            | 0.179   |       |                  |                  |         | 1.000                           | 1.000            | 1.000            | 0.633   |       |                  |                  |         | 1.000                        | 1.000            | 1.000            | <0.001  | 1.000 | 1.000            | 1.000            | 0.020   |
| <b>Economy &amp; Growth</b>                                                                                                     |                     |                   |                  |         |       |                  |                  |         |                                 |                  |                  |         |       |                  |                  |         |                              |                  |                  |         |       |                  |                  |         |
| GDP per capita (current 1,000 US\$)                                                                                             | 1.054               | 1.038             | 1.071            | <0.001  | 1.029 | 1.013            | 1.045            | <0.001  | 1.086                           | 1.056            | 1.117            | <0.001  | 1.031 | 1.021            | 1.041            | <0.001  | 1.045                        | 1.019            | 1.072            | 0.001   | 0.998 | 0.987            | 1.009            | 0.696   |
| <b>Health</b>                                                                                                                   |                     |                   |                  |         |       |                  |                  |         |                                 |                  |                  |         |       |                  |                  |         |                              |                  |                  |         |       |                  |                  |         |
| People using at least basic sanitation services (% of population)                                                               | 1.063               | 1.048             | 1.078            | <0.001  | 1.022 | 1.005            | 1.039            | 0.010   | 1.088                           | 1.065            | 1.111            | <0.001  | 1.001 | 0.985            | 1.016            | 0.897   | 1.056                        | 1.045            | 1.066            | <0.001  | 1.011 | 0.998            | 1.025            | 0.102   |
| Current health expenditure (% of GDP)                                                                                           | 1.186               | 1.045             | 1.345            | 0.008   | 1.088 | 0.956            | 1.238            | 0.203   | 1.501                           | 1.245            | 1.809            | <0.001  | 1.211 | 1.040            | 1.411            | 0.013   | 1.416                        | 1.216            | 1.648            | <0.001  | 1.080 | 0.968            | 1.206            | 0.169   |
| Death rate, crude (per 1,000 people)                                                                                            | 0.954               | 0.862             | 1.057            | 0.371   |       |                  |                  |         | 1.097                           | 0.857            | 1.403            | 0.462   |       |                  |                  |         | 1.187                        | 0.978            | 1.439            | 0.082   |       |                  |                  |         |
| Domestic private health expenditure (% of current health expenditure)                                                           | 0.955               | 0.933             | 0.978            | <0.001  | 0.988 | 0.972            | 1.004            | 0.135   | 0.937                           | 0.906            | 0.969            | <0.001  | 0.986 | 0.970            | 1.001            | 0.102   | 0.951                        | 0.933            | 0.970            | <0.001  | 1.010 | 0.994            | 1.027            | 0.207   |
| Domestic private health expenditure per capita (current US\$)                                                                   | 1.003               | 1.002             | 1.003            | <0.001  | 1.001 | 1.000            | 1.001            | 0.119   | 1.005                           | 1.003            | 1.008            | <0.001  | 1.001 | 1.000            | 1.001            | 0.104   | 1.003                        | 1.001            | 1.004            | <0.001  | 1.000 | 1.000            | 1.001            | 0.438   |
| Hospital beds (per 1,000 people)                                                                                                | 1.246               | 1.034             | 1.502            | 0.021   | 0.906 | 0.790            | 1.039            | 0.156   | 1.798                           | 1.067            | 3.030            | 0.028   | 0.799 | 0.696            | 0.911            | 0.001   | 1.302                        | 1.022            | 1.659            | 0.033   | 0.731 | 0.641            | 0.833            | <0.001  |
| Net migration                                                                                                                   | 1.000               | 1.000             | 1.000            | <0.001  | 1.000 | 1.000            | 1.000            | 0.954   | 1.000                           | 1.000            | 1.000            | 0.001   | 1.000 | 1.000            | 1.000            | 0.530   | 1.000                        | 1.000            | 1.000            | 0.005   | 1.000 | 1.000            | 1.000            | 0.103   |
| Nurses and midwives (per 1,000 people)                                                                                          | 1.239               | 1.149             | 1.337            | <0.001  | 0.901 | 0.813            | 1.002            | 0.052   | 1.499                           | 1.268            | 1.773            | <0.001  | 0.837 | 0.749            | 0.931            | 0.002   | 1.290                        | 1.111            | 1.498            | 0.001   | 0.904 | 0.820            | 0.997            | 0.044   |
| Physicians (per 1,000 people)                                                                                                   | 1.938               | 1.393             | 2.698            | <0.001  | 1.005 | 0.750            | 1.347            | 0.972   | 3.389                           | 2.652            | 4.331            | <0.001  | 1.725 | 1.191            | 2.491            | 0.004   | 2.600                        | 1.739            | 3.886            | <0.001  | 0.951 | 0.758            | 1.192            | 0.661   |
| Population ages 65 and above (% of total population)                                                                            | 1.111               | 1.054             | 1.171            | <0.001  | 0.981 | 0.913            | 1.055            | 0.609   | 1.235                           | 1.151            | 1.326            | <0.001  | 1.066 | 0.968            | 1.171            | 0.192   | 1.233                        | 1.144            | 1.328            | <0.001  | 1.062 | 0.988            | 1.141            | 0.102   |
| Proportion of population spending more than 25% of household consumption or income on out-of-pocket health care expenditure (%) | 0.802               | 0.675             | 0.953            | 0.012   | 0.846 | 0.750            | 0.955            | 0.007   | 0.794                           | 0.626            | 1.007            | 0.057   |       |                  |                  |         | 0.898                        | 0.715            | 1.129            | 0.357   |       |                  |                  |         |
| <b>Infrastructure</b>                                                                                                           |                     |                   |                  |         |       |                  |                  |         |                                 |                  |                  |         |       |                  |                  |         |                              |                  |                  |         |       |                  |                  |         |
| Railways, passengers carried (million passenger-km)                                                                             | 1.000               | 1.000             | 1.000            | <0.001  | 1.000 | 1.000            | 1.000            | 0.323   | 1.000                           | 1.000            | 1.000            | 0.679   |       |                  |                  |         | 1.000                        | 1.000            | 1.000            | 0.498   |       |                  |                  |         |
| <b>Poverty</b>                                                                                                                  |                     |                   |                  |         |       |                  |                  |         |                                 |                  |                  |         |       |                  |                  |         |                              |                  |                  |         |       |                  |                  |         |
| Poverty headcount ratio at national poverty lines (% of population)                                                             | 0.924               | 0.900             | 0.949            | <0.001  | 0.970 | 0.948            | 0.993            | 0.011   | 0.894                           | 0.872            | 0.916            | <0.001  | 0.960 | 0.940            | 0.982            | <0.001  | 0.908                        | 0.889            | 0.926            | <0.001  | 0.963 | 0.945            | 0.982            | <0.001  |
| <b>Science &amp; Technology</b>                                                                                                 |                     |                   |                  |         |       |                  |                  |         |                                 |                  |                  |         |       |                  |                  |         |                              |                  |                  |         |       |                  |                  |         |
| Researchers in R&D (per million people)                                                                                         | 1.000               | 1.000             | 1.001            | <0.001  | 1.000 | 1.000            | 1.000            | 0.159   | 1.000                           | 1.000            | 1.001            | 0.034   | 1.000 | 1.000            | 1.000            | 0.115   | 1.001                        | 1.001            | 1.001            | <0.001  | 1.000 | 1.000            | 1.001            | 0.012   |
| <b>Social Protection &amp; Labor</b>                                                                                            |                     |                   |                  |         |       |                  |                  |         |                                 |                  |                  |         |       |                  |                  |         |                              |                  |                  |         |       |                  |                  |         |
| Coverage of social insurance programs (% of population)                                                                         | 1.060               | 1.041             | 1.079            | <0.001  | 1.047 | 1.009            | 1.086            | 0.014   | 1.036                           | 0.992            | 1.082            | 0.110   |       |                  |                  |         | 1.091                        | 1.072            | 1.110            | <0.001  | 1.015 | 0.991            | 1.039            | 0.214   |
| Unemployment, total (% of total labor force) (national estimate)                                                                | 0.902               | 0.828             | 0.982            | 0.018   | 0.956 | 0.909            | 1.004            | 0.072   | 1.002                           | 0.861            | 1.166            | 0.984   |       |                  |                  |         | 0.986                        | 0.866            | 1.122            | 0.828   |       |                  |                  |         |
| <b>Climate</b>                                                                                                                  |                     |                   |                  |         |       |                  |                  |         |                                 |                  |                  |         |       |                  |                  |         |                              |                  |                  |         |       |                  |                  |         |
| Mean temperature (Celsius)                                                                                                      | 0.934               | 0.897             | 0.972            | 0.001   | 1.039 | 0.992            | 1.088            | 0.105   | 0.975                           | 0.887            | 1.071            | 0.592   |       |                  |                  |         | 0.834                        | 0.800            | 0.869            | <0.001  | 0.978 | 0.939            | 1.018            | 0.280   |
| Relative humidity (%)                                                                                                           | 1.011               | 0.994             | 1.027            | 0.204   |       |                  |                  |         | 1.025                           | 0.995            | 1.056            | 0.108   |       |                  |                  |         | 0.990                        | 0.960            | 1.022            | 0.538   |       |                  |                  |         |
| Mean wind speed (.1 knots);                                                                                                     | 1.210               | 1.111             | 1.317            | <0.001  | 1.040 | 0.957            | 1.130            | 0.358   | 1.155                           | 0.951            | 1.403            | 0.146   |       |                  |                  |         | 0.958                        | 0.836            | 1.097            | 0.533   |       |                  |                  |         |
| Precipitation amount (.01 inches).                                                                                              | 0.082               | 0.016             | 0.003            | 0.003   | 0.477 | 0.126            | 1.808            | 0.276   | 0.019                           | 0.001            | 0.377            | 0.009   | 0.425 | 0.123            | 1.471            | 0.177   | 0.204                        | 0.005            | 8.409            | 0.402   |       |                  |                  |         |

\*IRR, incidence rate ratio.  
 †CI is short for confidence interval.  
 ‡aIRR, adjusted incidence rate ratio.

medRxiv preprint doi: <https://doi.org/10.1101/2020.04.23.20077545>; this version posted May 4, 2020. The copyright holder for this preprint (which was not certified by peer review) is the author/funder, who has granted medRxiv a license to display the preprint in perpetuity. It is made available under a CC-BY 4.0 International license.

**Table S1 Characteristics of 178 countries/regions with reported cases of COVID-19 as of 6 April 2020**

| Continents | UN geographical divisions | Countries/regions        | IR†   | CMR‡ | DCI§     | Total population | Days since first reported case |
|------------|---------------------------|--------------------------|-------|------|----------|------------------|--------------------------------|
| Africa     | Eastern Africa            | Burundi                  | 0.00  | 0.00 | 0.43     | 11175378         | 7                              |
|            |                           | Djibouti                 | 32.33 | 0.00 | 4.50     | 958920           | 20                             |
|            |                           | Eritrea                  | 0.62  | 0.00 | 1.82     | 3213972          | 17                             |
|            |                           | Ethiopia                 | 0.01  | 0.02 | 1.76     | 109224559        | 25                             |
|            |                           | Kenya                    | 0.31  | 0.12 | 6.32     | 51393010         | 25                             |
|            |                           | Madagascar               | 0.38  | 0.00 | 4.56     | 26262368         | 18                             |
|            |                           | Malawi                   | 0.06  | 0.00 | 1.00     | 18143315         | 5                              |
|            |                           | Mauritius                | 13.44 | 5.53 | 12.20    | 1265303          | 20                             |
|            |                           | Mozambique               | 0.00  | 0.00 | 0.63     | 29495962         | 16                             |
|            |                           | Rwanda                   | 0.08  | 0.00 | 4.38     | 12301939         | 24                             |
|            |                           | Seychelles               | 10.34 | 0.00 | 0.46     | 96762            | 24                             |
|            |                           | Somalia                  | 0.00  | 0.00 | 0.32     | 15008154         | 22                             |
|            |                           | Sudan                    | 0.00  | 0.05 | 0.48     | 41801533         | 25                             |
|            |                           | Tanzania                 | 0.04  | 0.02 | 1.09     | 56318348         | 22                             |
|            |                           | Uganda                   | 0.00  | 0.00 | 3.06     | 42723139         | 17                             |
|            |                           | Zambia                   | 0.00  | 0.06 | 1.95     | 17351822         | 20                             |
|            | Zimbabwe                  | 0.07                     | 0.07  | 0.56 | 14439018 | 18               |                                |
|            | Middle Africa             | Angola                   | 0.06  | 0.06 | 0.89     | 30809762         | 18                             |
|            |                           | Cameroon                 | 0.32  | 0.36 | 20.56    | 25216237         | 32                             |
|            |                           | Central African Republic | 0.00  | 0.00 | 0.35     | 4666377          | 23                             |
|            |                           | Chad                     | 0.00  | 0.00 | 0.47     | 15477751         | 19                             |
|            |                           | Congo (Brazzaville)      | 0.00  | 0.95 | 1.96     | 5244363          | 23                             |
|            |                           | Congo (Kinshasa)         | 0.08  | 0.21 | 5.96     | 84068091         | 27                             |
|            |                           | Equatorial Guinea        | 0.00  | 0.00 | 0.70     | 1308974          | 23                             |
|            |                           | Gabon                    | 1.42  | 0.47 | 1.00     | 2119275          | 24                             |
|            | Northern Africa           | Algeria                  | 2.44  | 4.10 | 33.88    | 42228429         | 42                             |
|            |                           | Egypt                    | 1.51  | 0.86 | 24.94    | 98423595         | 53                             |
|            |                           | Libya                    | 0.15  | 0.15 | 1.36     | 6678567          | 14                             |
|            |                           | Morocco                  | 2.75  | 2.22 | 31.11    | 36029138         | 36                             |
|            |                           | Tunisia                  | 1.90  | 1.90 | 17.53    | 11565204         | 34                             |



|      |                    |               |       |      |        |            |    |
|------|--------------------|---------------|-------|------|--------|------------|----|
|      | Southern Africa    | Botswana      | 0.00  | 0.44 | 0.75   | 2254126    | 8  |
|      |                    | Namibia       | 0.00  | 0.00 | 0.67   | 2448255    | 24 |
|      |                    | South Africa  | 0.54  | 0.21 | 51.09  | 57779622   | 33 |
|      | Western Africa     | Benin         | 0.35  | 0.09 | 1.18   | 11485048   | 22 |
|      |                    | Burkina Faso  | 0.96  | 0.91 | 13.00  | 19751535   | 28 |
|      |                    | Gambia        | 0.00  | 0.44 | 0.19   | 2280102    | 21 |
|      |                    | Ghana         | 0.00  | 0.17 | 8.92   | 29767108   | 24 |
|      |                    | Guinea-Bissau | 0.00  | 0.00 | 1.38   | 1874309    | 13 |
|      |                    | Liberia       | 0.21  | 0.62 | 0.64   | 4818977    | 22 |
|      |                    | Mali          | 0.10  | 0.26 | 3.62   | 19077690   | 13 |
|      |                    | Mauritania    | 0.00  | 0.23 | 0.25   | 4403319    | 24 |
|      |                    | Niger         | 3.07  | 0.45 | 14.06  | 22442948   | 18 |
|      |                    | Nigeria       | 0.03  | 0.03 | 6.10   | 195874740  | 39 |
|      |                    | Senegal       | 0.25  | 0.13 | 6.28   | 15854360   | 36 |
|      |                    | Sierra Leone  | 0.00  | 0.00 | 0.86   | 7650154    | 7  |
|      |                    | Togo          | 1.77  | 0.38 | 1.81   | 7889094    | 32 |
| Asia | Central Asia       | Kazakhstan    | 4.27  | 0.33 | 26.48  | 18276499   | 25 |
|      |                    | Kyrgyzstan    | 10.93 | 0.63 | 10.80  | 6315800    | 20 |
|      |                    | Uzbekistan    | 3.49  | 0.06 | 19.87  | 32955400   | 23 |
|      | Eastern Asia       | China         | 0.05  | 2.39 | 965.56 | 1392730000 | 86 |
|      |                    | Japan         | 4.07  | 0.67 | 44.56  | 126529100  | 82 |
|      |                    | Korea, South  | 0.91  | 3.60 | 133.56 | 51635256   | 77 |
|      |                    | Mongolia      | 0.32  | 0.00 | 0.54   | 3170208    | 28 |
|      | South-Eastern Asia | Brunei        | 0.00  | 2.33 | 4.66   | 428962     | 29 |
|      |                    | Cambodia      | 0.00  | 0.00 | 1.61   | 16249798   | 71 |
|      |                    | Indonesia     | 0.81  | 0.78 | 69.19  | 267663435  | 36 |
|      |                    | Laos          | 0.14  | 0.00 | 0.86   | 7061507    | 14 |
|      |                    | Malaysia      | 4.16  | 1.97 | 51.96  | 31528585   | 73 |
|      |                    | Philippines   | 3.88  | 1.53 | 53.82  | 106651922  | 68 |
|      |                    | Singapore     | 11.71 | 1.06 | 18.33  | 5638676    | 75 |
|      |                    | Thailand      | 0.73  | 0.37 | 26.43  | 69428524   | 84 |
|      |                    | Vietnam       | 0.04  | 0.00 | 3.27   | 95540395   | 75 |

|        |                |                      |       |       |         |            |    |
|--------|----------------|----------------------|-------|-------|---------|------------|----|
|        | Southern Asia  | Afghanistan          | 0.48  | 0.30  | 8.53    | 37172386   | 43 |
|        |                | Bangladesh           | 0.22  | 0.07  | 4.10    | 161356039  | 30 |
|        |                | Bhutan               | 0.00  | 0.00  | 0.16    | 754394     | 32 |
|        |                | India                | 0.88  | 0.10  | 70.26   | 1352617328 | 68 |
|        |                | Iran                 | 27.82 | 45.71 | 1260.42 | 81800269   | 48 |
|        |                | Maldives             | 0.00  | 0.00  | 0.63    | 515696     | 30 |
|        |                | Nepal                | 0.00  | 0.00  | 0.12    | 28087871   | 73 |
|        |                | Pakistan             | 2.87  | 0.25  | 91.85   | 212215030  | 41 |
|        |                | Sri Lanka            | 0.09  | 0.23  | 2.51    | 21670000   | 71 |
|        | Western Asia   | Armenia              | 3.73  | 2.71  | 22.51   | 2951776    | 37 |
|        |                | Azerbaijan           | 5.73  | 0.70  | 17.32   | 9942334    | 37 |
|        |                | Bahrain              | 35.70 | 2.55  | 17.58   | 1569439    | 43 |
|        |                | Cyprus               | 15.98 | 7.57  | 16.03   | 1189265    | 29 |
|        |                | Georgia              | 3.75  | 0.54  | 4.59    | 3731000    | 41 |
|        |                | Iraq                 | 1.82  | 1.67  | 23.98   | 38433600   | 43 |
|        |                | Israel               | 53.41 | 6.42  | 193.57  | 8883800    | 46 |
|        |                | Jordan               | 0.40  | 0.60  | 9.97    | 9956011    | 35 |
|        |                | Kuwait               | 26.35 | 0.24  | 15.47   | 4137309    | 43 |
|        |                | Lebanon              | 2.04  | 2.77  | 11.76   | 6848925    | 46 |
|        |                | Oman                 | 6.83  | 0.41  | 7.70    | 4829483    | 43 |
|        |                | Qatar                | 82.02 | 1.44  | 48.21   | 2781677    | 38 |
|        |                | Saudi Arabia         | 6.02  | 1.13  | 72.36   | 33699947   | 36 |
|        |                | Turkey               | 38.26 | 7.88  | 1119.15 | 82319724   | 27 |
|        |                | United Arab Emirates | 28.77 | 1.14  | 30.09   | 9630959    | 69 |
| Europe | Eastern Europe | Belarus              | 14.55 | 1.37  | 17.95   | 9485386    | 39 |
|        |                | Bulgaria             | 2.56  | 3.13  | 18.30   | 7024216    | 30 |
|        |                | Czechia              | 22.13 | 7.34  | 130.32  | 10625695   | 37 |
|        |                | Hungary              | 1.13  | 3.89  | 21.88   | 9768785    | 34 |
|        |                | Moldova              | 28.49 | 5.36  | 32.17   | 3545883    | 30 |
|        |                | Poland               | 8.19  | 2.82  | 129.79  | 37978548   | 34 |
|        |                | Romania              | 9.91  | 9.04  | 98.95   | 19473936   | 41 |
|        |                | Russia               | 6.60  | 0.33  | 94.67   | 144478050  | 67 |

|                 |                              |        |        |         |          |    |
|-----------------|------------------------------|--------|--------|---------|----------|----|
|                 | Slovakia                     | 9.00   | 0.37   | 16.69   | 5447011  | 32 |
|                 | Ukraine                      | 0.25   | 0.85   | 37.69   | 44622516 | 35 |
| Northern Europe | Denmark                      | 53.86  | 32.26  | 117.03  | 5797446  | 40 |
|                 | Estonia                      | 8.33   | 14.38  | 27.70   | 1320884  | 40 |
|                 | Faroe Islands (Denmark)      | 41.40  | 0.00   | 5.38    | 48497    | 34 |
|                 | Finland                      | 45.14  | 4.89   | 31.54   | 5518050  | 69 |
|                 | Iceland                      | 215.90 | 16.97  | 40.05   | 353574   | 39 |
|                 | Ireland                      | 76.32  | 35.85  | 141.16  | 4853506  | 38 |
|                 | Isle of Man (United Kingdom) | 142.96 | 11.89  | 7.72    | 84077    | 18 |
|                 | Latvia                       | 4.67   | 0.52   | 15.06   | 1926542  | 36 |
|                 | Lithuania                    | 11.47  | 5.38   | 21.62   | 2789533  | 39 |
|                 | Norway                       | 33.53  | 14.30  | 143.05  | 5314336  | 41 |
|                 | Sweden                       | 36.95  | 46.84  | 107.55  | 10183175 | 67 |
|                 | United Kingdom               | 57.23  | 80.81  | 770.27  | 66488991 | 67 |
| Southern Europe | Albania                      | 5.58   | 7.33   | 13.00   | 2866376  | 29 |
|                 | Andorra                      | 313.80 | 272.71 | 14.58   | 77006    | 36 |
|                 | Bosnia and Herzegovina       | 6.02   | 8.72   | 20.42   | 3323929  | 33 |
|                 | Croatia                      | 9.78   | 3.91   | 29.10   | 4089400  | 42 |
|                 | Gibraltar (United Kingdom)   | 178.52 | 0.00   | 3.21    | 33718    | 34 |
|                 | Greece                       | 1.86   | 7.36   | 42.80   | 10727668 | 41 |
|                 | Italy                        | 59.69  | 273.42 | 1978.31 | 60431283 | 67 |
|                 | Malta                        | 28.97  | 0.00   | 7.77    | 483530   | 31 |
|                 | Montenegro                   | 30.54  | 3.21   | 11.10   | 622345   | 21 |
|                 | Portugal                     | 44.01  | 30.25  | 325.83  | 10281762 | 36 |
|                 | San Marino                   | 0.00   | 947.17 | 6.65    | 33785    | 40 |
|                 | Serbia                       | 41.83  | 8.31   | 68.75   | 6982084  | 32 |
|                 | Slovenia                     | 11.61  | 14.51  | 30.94   | 2067372  | 33 |
| Western Europe  | Spain                        | 107.95 | 285.53 | 2070.83 | 46723749 | 66 |
|                 | Austria                      | 27.84  | 24.87  | 292.79  | 8847037  | 42 |
|                 | Belgium                      | 98.50  | 142.88 | 330.38  | 11422068 | 63 |
|                 | France                       | 77.31  | 133.03 | 1324.46 | 66987244 | 74 |
|                 | Germany                      | 39.25  | 21.83  | 1455.97 | 82927922 | 71 |

|               |                  |                                           |        |        |        |           |    |
|---------------|------------------|-------------------------------------------|--------|--------|--------|-----------|----|
|               |                  | Liechtenstein                             | 0.00   | 26.38  | 2.26   | 37910     | 34 |
|               |                  | Luxembourg                                | 64.48  | 67.46  | 74.82  | 607728    | 38 |
|               |                  | Monaco                                    | 103.61 | 25.85  | 2.03   | 38682     | 38 |
|               |                  | Netherlands                               | 55.31  | 108.35 | 470.08 | 17231017  | 40 |
|               |                  | Switzerland                               | 65.57  | 89.83  | 515.64 | 8516543   | 42 |
| North America | Caribbean        | Antigua and Barbuda                       | 0.00   | 0.00   | 0.60   | 96286     | 25 |
|               |                  | Bahamas                                   | 2.59   | 12.97  | 1.32   | 385640    | 22 |
|               |                  | Barbados                                  | 13.96  | 6.98   | 2.86   | 286641    | 21 |
|               |                  | British Virgin Islands (United Kingdom)   | 0.00   | 0.00   | 0.30   | 29802     | 10 |
|               |                  | Cayman Islands (United Kingdom)           | 62.37  | 15.58  | 1.56   | 64174     | 25 |
|               |                  | Cuba                                      | 2.65   | 0.79   | 13.46  | 11338138  | 26 |
|               |                  | Dominica                                  | 13.96  | 0.00   | 0.94   | 71625     | 16 |
|               |                  | Dominican Republic                        | 7.81   | 8.09   | 49.41  | 10627165  | 37 |
|               |                  | Grenada                                   | 0.00   | 0.00   | 0.75   | 111454    | 16 |
|               |                  | Haiti                                     | 0.27   | 0.09   | 1.33   | 11123176  | 18 |
|               |                  | Jamaica                                   | 0.00   | 1.02   | 2.15   | 2934855   | 27 |
|               |                  | Saint Kitts and Nevis                     | 0.00   | 0.00   | 0.77   | 52441     | 13 |
|               |                  | Saint Lucia                               | 0.00   | 0.00   | 0.58   | 181889    | 24 |
|               |                  | Saint Vincent and the Grenadines          | 0.00   | 0.00   | 0.29   | 110210    | 24 |
|               |                  | Trinidad and Tobago                       | 0.72   | 5.76   | 4.38   | 1389858   | 24 |
|               |                  | Turks and Caicos Islands (United Kingdom) | 79.67  | 26.55  | 0.80   | 37665     | 10 |
|               | Central America  | Belize                                    | 5.22   | 2.61   | 0.47   | 383071    | 15 |
|               |                  | Costa Rica                                | 2.60   | 0.40   | 14.59  | 4999441   | 32 |
|               |                  | El Salvador                               | 1.09   | 0.62   | 3.63   | 6420744   | 19 |
|               |                  | Guatemala                                 | 0.52   | 0.17   | 2.92   | 17247807  | 24 |
|               |                  | Honduras                                  | 3.13   | 2.29   | 11.04  | 9587522   | 27 |
|               |                  | Mexico                                    | 2.00   | 0.74   | 54.95  | 126190788 | 39 |
|               |                  | Nicaragua                                 | 0.00   | 0.15   | 0.32   | 6465513   | 19 |
|               |                  | Panama                                    | 44.79  | 12.93  | 71.00  | 4176873   | 28 |
|               | Northern America | Bermuda (United Kingdom)                  | 31.28  | 31.27  | 2.05   | 63968     | 19 |
|               |                  | Canada                                    | 21.76  | 9.12   | 229.89 | 37058856  | 72 |
|               |                  | Greenland (Denmark)                       | 0.00   | 0.00   | 0.50   | 56025     | 22 |

|               |                           |                           |       |       |          |           |    |
|---------------|---------------------------|---------------------------|-------|-------|----------|-----------|----|
|               |                           | US                        | 90.40 | 32.96 | 4823.87  | 327167434 | 76 |
| Oceania       | Australia and New Zealand | Australia                 | 4.40  | 1.60  | 80.51    | 24992369  | 72 |
|               |                           | New Zealand               | 13.72 | 0.20  | 28.36    | 4885500   | 39 |
|               | Melanesia                 | Fiji                      | 2.26  | 0.00  | 0.74     | 883483    | 19 |
|               |                           | French Polynesia (France) | 3.60  | 0.00  | 1.68     | 277679    | 25 |
|               |                           | Guinea                    | 0.56  | 0.00  | 5.12     | 12414318  | 25 |
|               |                           | New Caledonia (France)    | 0.00  | 0.00  | 0.95     | 284060    | 19 |
|               |                           | Papua New Guinea          | 0.12  | 0.00  | 0.11     | 8606316   | 18 |
| South America | South America             | Argentina                 | 2.31  | 1.08  | 44.40    | 44494502  | 35 |
|               |                           | Bolivia                   | 2.29  | 0.97  | 6.78     | 11353142  | 27 |
|               |                           | Brazil                    | 4.92  | 2.69  | 296.61   | 209469333 | 41 |
|               |                           | Chile                     | 18.37 | 1.98  | 137.57   | 18729160  | 35 |
|               |                           | Colombia                  | 1.89  | 0.93  | 49.34    | 49648685  | 32 |
|               |                           | Ecuador                   | 5.91  | 11.18 | 101.27   | 17084357  | 37 |
|               |                           | Guyana                    | 8.99  | 5.13  | 1.19     | 779004    | 26 |
|               |                           | Paraguay                  | 1.29  | 0.72  | 3.77     | 6956071   | 30 |
|               |                           | Peru                      | 8.75  | 2.88  | 80.03    | 31989256  | 32 |
|               |                           | Suriname                  | 0.00  | 1.74  | 0.42     | 575991    | 24 |
|               | Uruguay                   | 1.74                      | 1.74  | 16.92 | 3449299  | 24        |    |
|               | Venezuela                 | 0.21                      | 0.24  | 6.88  | 28870195 | 24        |    |

†IR, incidence rate (per 10 million people).

‡CMR, cumulative mortality rate (per 10 million people).

§DCI, daily cumulative index (%)

**Table S2. The Global Moran's I index of IR, CMR and DCI for COVID-19**

| Variables | I     | E(I)   | sd(I) | z     | p-value |
|-----------|-------|--------|-------|-------|---------|
| IR        | 0.339 | -0.006 | 0.056 | 6.171 | <0.001  |
| CMR       | 0.297 | -0.006 | 0.040 | 7.535 | <0.001  |
| DCI       | 0.159 | -0.006 | 0.049 | 3.379 | 0.001   |

**Table S3. Correlation matrix between socio-economic factors for the risk of COVID-19**

| Variables | (1)     | (2)     | (3)     | (4)     | (5)     | (6)     | (7)     | (8)     | (9)     | (10)    | (11)    | (12)    | (13)    | (14)    | (15)    | (16)    | (17)    | (18)    | (19)   | (20)    | (21)   | (22)   | (23)   | (24)    | (25)    | (26)    | (27)   | (28)  |
|-----------|---------|---------|---------|---------|---------|---------|---------|---------|---------|---------|---------|---------|---------|---------|---------|---------|---------|---------|--------|---------|--------|--------|--------|---------|---------|---------|--------|-------|
| (1)       | 1.000   |         |         |         |         |         |         |         |         |         |         |         |         |         |         |         |         |         |        |         |        |        |        |         |         |         |        |       |
| (2)       | -0.420* | 1.000   |         |         |         |         |         |         |         |         |         |         |         |         |         |         |         |         |        |         |        |        |        |         |         |         |        |       |
| (3)       | 0.188*  | -0.075  | 1.000   |         |         |         |         |         |         |         |         |         |         |         |         |         |         |         |        |         |        |        |        |         |         |         |        |       |
| (4)       | 0.444*  | -0.360* | 0.488*  | 1.000   |         |         |         |         |         |         |         |         |         |         |         |         |         |         |        |         |        |        |        |         |         |         |        |       |
| (5)       | 0.585*  | -0.717* | 0.111   | 0.448*  | 1.000   |         |         |         |         |         |         |         |         |         |         |         |         |         |        |         |        |        |        |         |         |         |        |       |
| (6)       | 0.218*  | -0.289* | -0.148* | 0.175*  | 0.243*  | 1.000   |         |         |         |         |         |         |         |         |         |         |         |         |        |         |        |        |        |         |         |         |        |       |
| (7)       | 0.468*  | -0.327* | 0.099   | 0.656*  | 0.421*  | 0.574*  | 1.000   |         |         |         |         |         |         |         |         |         |         |         |        |         |        |        |        |         |         |         |        |       |
| (8)       | -0.110  | -0.335* | -0.061  | -0.052  | -0.086  | 0.239*  | 0.060   | 1.000   |         |         |         |         |         |         |         |         |         |         |        |         |        |        |        |         |         |         |        |       |
| (9)       | -0.328* | 0.178*  | -0.064  | -0.368* | -0.269* | -0.219* | -0.404* | -0.011  | 1.000   |         |         |         |         |         |         |         |         |         |        |         |        |        |        |         |         |         |        |       |
| (10)      | 0.436*  | -0.376* | 0.106   | 0.580*  | 0.439*  | 0.514*  | 0.890*  | 0.013   | -0.194* | 1.000   |         |         |         |         |         |         |         |         |        |         |        |        |        |         |         |         |        |       |
| (11)      | 0.376*  | -0.602* | 0.293*  | 0.407*  | 0.497*  | 0.195*  | 0.304*  | 0.380*  | -0.296* | 0.268*  | 1.000   |         |         |         |         |         |         |         |        |         |        |        |        |         |         |         |        |       |
| (12)      | 0.573*  | -0.653* | 0.106   | 0.559*  | 0.858*  | 0.345*  | 0.557*  | -0.158* | -0.383* | 0.536*  | 0.454*  | 1.000   |         |         |         |         |         |         |        |         |        |        |        |         |         |         |        |       |
| (13)      | -0.503* | 0.632*  | -0.085  | -0.367* | -0.858* | -0.110  | -0.351* | 0.106   | 0.283*  | -0.360* | -0.462* | -0.807* | 1.000   |         |         |         |         |         |        |         |        |        |        |         |         |         |        |       |
| (14)      | -0.521* | 0.690*  | -0.116  | -0.455* | -0.861* | -0.302* | -0.457* | 0.107   | 0.381*  | -0.455* | -0.534* | -0.913* | 0.858*  | 1.000   |         |         |         |         |        |         |        |        |        |         |         |         |        |       |
| (15)      | 0.217*  | -0.033  | 0.006   | 0.228*  | 0.164*  | 0.397*  | 0.426*  | 0.050   | -0.353* | 0.279*  | 0.163*  | 0.193*  | -0.120  | -0.191* | 1.000   |         |         |         |        |         |        |        |        |         |         |         |        |       |
| (16)      | 0.503*  | -0.493* | 0.288*  | 0.659*  | 0.567*  | 0.416*  | 0.758*  | 0.182*  | -0.419* | 0.649*  | 0.613*  | 0.616*  | -0.507* | -0.600* | 0.285*  | 1.000   |         |         |        |         |        |        |        |         |         |         |        |       |
| (17)      | 0.534*  | -0.674* | 0.088   | 0.405*  | 0.875*  | 0.289*  | 0.401*  | -0.063  | -0.221* | 0.412*  | 0.451*  | 0.837*  | -0.825* | -0.832* | 0.132   | 0.568*  | 1.000   |         |        |         |        |        |        |         |         |         |        |       |
| (18)      | 0.556*  | -0.662* | 0.218*  | 0.497*  | 0.660*  | 0.441*  | 0.571*  | 0.276*  | -0.339* | 0.525*  | 0.600*  | 0.676*  | -0.594* | -0.690* | 0.190*  | 0.747*  | 0.658*  | 1.000   |        |         |        |        |        |         |         |         |        |       |
| (19)      | 0.388*  | -0.715* | -0.059  | 0.358*  | 0.607*  | 0.546*  | 0.594*  | 0.524*  | -0.340* | 0.540*  | 0.587*  | 0.702*  | -0.558* | -0.662* | 0.219*  | 0.650*  | 0.606*  | 0.728*  | 1.000  |         |        |        |        |         |         |         |        |       |
| (20)      | -0.274* | 0.931*  | -0.038  | -0.249* | -0.606* | -0.246* | -0.230* | -0.427* | 0.133   | -0.272* | -0.544* | -0.561* | 0.564*  | 0.613*  | 0.055   | -0.390* | -0.594* | -0.569* | 0.703* | 1.000   |        |        |        |         |         |         |        |       |
| (21)      | -0.018  | -0.069  | 0.028   | -0.088  | 0.026   | 0.273*  | -0.071  | 0.090   | 0.335*  | 0.045   | 0.016   | 0.026   | 0.065   | 0.021   | -0.177* | -0.063  | 0.073   | 0.045   | 0.067  | -0.093  | 1.000  |        |        |         |         |         |        |       |
| (22)      | -0.105  | 0.056   | 0.003   | -0.110  | -0.103  | 0.235*  | -0.097  | 0.050   | 0.280*  | -0.013  | -0.105  | -0.105  | 0.193*  | 0.160*  | -0.174* | -0.135  | -0.061  | -0.066  | 0.067  | 0.011   | 0.883* | 1.000  |        |         |         |         |        |       |
| (23)      | -0.065  | 0.020   | -0.006  | -0.051  | -0.026  | -0.078  | -0.031  | 0.019   | 0.147*  | -0.038  | -0.010  | -0.020  | -0.011  | 0.010   | -0.347* | -0.027  | 0.004   | -0.026  | 0.008  | -0.050  | 0.133  | 0.116  | 1.000  |         |         |         |        |       |
| (24)      | -0.355* | 0.453*  | 0.027   | -0.237* | -0.639* | -0.222* | -0.341* | 0.045   | 0.189*  | -0.312* | -0.371* | -0.676* | 0.658*  | 0.660*  | -0.111  | -0.456* | -0.727* | -0.500* | 0.540* | 0.447*  | -0.080 | 0.018  | -0.101 | 1.000   |         |         |        |       |
| (25)      | 0.459*  | -0.399* | 0.040   | 0.509*  | 0.447*  | 0.486*  | 0.778*  | 0.217*  | -0.375* | 0.666*  | 0.419*  | 0.584*  | -0.392* | -0.501* | 0.275*  | 0.724*  | 0.449*  | 0.600*  | 0.28*  | -0.329* | -0.029 | -0.108 | -0.004 | -0.439* | 1.000   |         |        |       |
| (26)      | 0.368*  | -0.324* | -0.020  | 0.542*  | 0.381*  | 0.509*  | 0.828*  | 0.200*  | -0.399* | 0.703*  | 0.341*  | 0.533*  | -0.339* | -0.440* | 0.281*  | 0.730*  | 0.373*  | 0.568*  | 0.67*  | -0.260* | -0.076 | -0.108 | -0.009 | -0.362* | 0.838*  | 1.000   |        |       |
| (27)      | 0.498*  | -0.598* | 0.033   | 0.368*  | 0.586*  | 0.451*  | 0.544*  | 0.350*  | -0.285* | 0.482*  | 0.551*  | 0.630*  | -0.568* | -0.640* | 0.249*  | 0.704*  | 0.664*  | 0.697*  | 0.82*  | -0.534* | 0.089  | -0.055 | 0.036  | -0.586* | 0.693*  | 0.617*  | 1.000  |       |
| (28)      | -0.019  | -0.031  | -0.052  | -0.203* | 0.013   | 0.019   | -0.175* | 0.053   | 0.141   | -0.113  | -0.039  | -0.118  | -0.015  | 0.049   | -0.013  | -0.144  | -0.096  | -0.114  | 0.68   | -0.041  | 0.050  | -0.004 | -0.067 | 0.167*  | -0.183* | -0.167* | -0.110 | 1.000 |

\* shows significance at the .05 level

medRxiv preprint doi: <https://doi.org/10.1101/2020.04.23.20077545>; this version posted May 24, 2020. The copyright holder for this preprint (which was not certified by peer review) is the author/funder, who has granted medRxiv a license to display the preprint in perpetuity. It is made available under a CC-BY-NC-ND 4.0 International license.

**Table S4. The sensitive analysis of single-factor negative binominal regression for the risk of COVID-19**

| Indicators                | IR    |                   |                  |         | CMR   |                  |                  |         | DCI   |                  |                  |         |
|---------------------------|-------|-------------------|------------------|---------|-------|------------------|------------------|---------|-------|------------------|------------------|---------|
|                           | IRR†  | 95%CI‡<br>(Lower) | 95%CI<br>(Upper) | p-value | IRR   | 95%CI<br>(Lower) | 95%CI<br>(Upper) | p-value | IRR   | 95%CI<br>(Lower) | 95%CI<br>(Upper) | p-value |
| Max temperature (Celsius) | 0.911 | 0.881             | 0.942            | <0.001  | 0.960 | 0.860            | 1.072            | 0.470   | 0.838 | 0.801            | 0.877            | <0.001  |
| Min temperature (Celsius) | 0.939 | 0.908             | 0.971            | <0.001  | 0.983 | 0.900            | 1.075            | 0.713   | 0.845 | 0.812            | 0.880            | <0.001  |

†IRR is short for incidence rate ratio.

‡CI is short for confidence interval.



**Table S5. The sensitive analysis of multiple-factor negative binominal regression for the risk of COVID-19**

| Indicators                                                                                                                      | Incidence rate (IR) |                |               |         | Cumulative mortality rate (CMR) |               |               |         | Daily cumulative index (DCI) |               |               |         |
|---------------------------------------------------------------------------------------------------------------------------------|---------------------|----------------|---------------|---------|---------------------------------|---------------|---------------|---------|------------------------------|---------------|---------------|---------|
|                                                                                                                                 | aIRR†               | 95%CI‡ (Lower) | 95%CI (Upper) | p-value | aIRR                            | 95%CI (Lower) | 95%CI (Upper) | p-value | aIRR                         | 95%CI (Lower) | 95%CI (Upper) | p-value |
| <b>Urban Development</b>                                                                                                        |                     |                |               |         |                                 |               |               |         |                              |               |               |         |
| Urban population (% of total population)                                                                                        |                     |                |               |         | 1.027                           | 1.010         | 1.044         | 0.001   | 1.023                        | 1.011         | 1.035         | 0.000   |
| Urban population growth (annual %)                                                                                              | 0.823               | 0.651          | 1.040         | 0.102   | 0.751                           | 0.507         | 1.112         | 0.153   | 1.020                        | 0.759         | 1.371         | 0.896   |
| Population density (people per sq. km of land area)                                                                             |                     |                |               |         |                                 |               |               |         | 1.000                        | 1.000         | 1.000         | 0.017   |
| <b>Economy &amp; Growth</b>                                                                                                     |                     |                |               |         |                                 |               |               |         |                              |               |               |         |
| GDP per capita (current 1,000 US\$)                                                                                             | 1.023               | 1.007          | 1.040         | 0.006   | 1.031                           | 1.021         | 1.041         | 0.000   | 0.998                        | 0.986         | 1.010         | 0.712   |
| <b>Health</b>                                                                                                                   |                     |                |               |         |                                 |               |               |         |                              |               |               |         |
| People using at least basic sanitation services (% of population)                                                               | 1.019               | 1.001          | 1.036         | 0.038   | 1.001                           | 0.985         | 1.018         | 0.897   | 1.013                        | 0.999         | 1.026         | 0.061   |
| Current health expenditure (% of GDP)                                                                                           | 1.119               | 0.983          | 1.273         | 0.088   | 1.211                           | 1.040         | 1.410         | 0.013   | 1.068                        | 0.962         | 1.186         | 0.215   |
| Death rate, crude (per 1,000 people)                                                                                            |                     |                |               |         |                                 |               |               |         |                              |               |               |         |
| Domestic private health expenditure (% of current health expenditure)                                                           | 0.986               | 0.970          | 1.003         | 0.100   | 0.986                           | 0.970         | 1.003         | 0.102   | 1.011                        | 0.995         | 1.027         | 0.180   |
| Domestic private health expenditure per capita (current US\$)                                                                   | 1.001               | 1.000          | 1.001         | 0.114   | 1.001                           | 1.000         | 1.001         | 0.104   | 1.000                        | 1.000         | 1.001         | 0.408   |
| Hospital beds (per 1,000 people)                                                                                                | 0.899               | 0.782          | 1.034         | 0.137   | 0.799                           | 0.696         | 0.916         | 0.001   | 0.719                        | 0.627         | 0.824         | 0.000   |
| Net migration                                                                                                                   | 1.000               | 1.000          | 1.000         | 0.538   | 1.000                           | 1.000         | 1.000         | 0.530   | 1.000                        | 1.000         | 1.000         | 0.075   |
| Nurses and midwives (per 1,000 people)                                                                                          | 0.937               | 0.845          | 1.039         | 0.218   | 0.837                           | 0.749         | 0.936         | 0.002   | 0.900                        | 0.818         | 0.990         | 0.031   |
| Physicians (per 1,000 people)                                                                                                   | 1.009               | 0.739          | 1.376         | 0.956   | 1.725                           | 1.191         | 2.498         | 0.004   | 0.940                        | 0.751         | 1.176         | 0.587   |
| Population ages 65 and above (% of total population)                                                                            | 0.976               | 0.905          | 1.052         | 0.519   | 1.066                           | 0.968         | 1.173         | 0.192   | 1.080                        | 1.000         | 1.167         | 0.051   |
| Proportion of population spending more than 25% of household consumption or income on out-of-pocket health care expenditure (%) | 0.822               | 0.719          | 0.939         | 0.004   |                                 |               |               |         |                              |               |               |         |
| <b>Infrastructure</b>                                                                                                           |                     |                |               |         |                                 |               |               |         |                              |               |               |         |
| Railways, passengers carried (million passenger-km)                                                                             | 1.000               | 1.000          | 1.000         | 0.242   |                                 |               |               |         |                              |               |               |         |
| <b>Poverty</b>                                                                                                                  |                     |                |               |         |                                 |               |               |         |                              |               |               |         |
| Poverty headcount ratio at national poverty lines (% of population)                                                             | 0.971               | 0.949          | 0.994         | 0.014   | 0.960                           | 0.940         | 0.982         | 0.000   | 0.962                        | 0.944         | 0.980         | 0.000   |
| <b>Science &amp; Technology</b>                                                                                                 |                     |                |               |         |                                 |               |               |         |                              |               |               |         |
| Researchers in R&D (per million)                                                                                                | 1.000               | 1.000          | 1.000         | 0.103   | 1.000                           | 1.000         | 1.000         | 0.115   | 1.000                        | 1.000         | 1.001         | 0.017   |

people)

**Social Protection & Labor**

|                                                                     |       |       |       |       |  |  |  |  |       |       |       |       |
|---------------------------------------------------------------------|-------|-------|-------|-------|--|--|--|--|-------|-------|-------|-------|
| Coverage of social insurance programs<br>(% of population)          | 1.042 | 1.002 | 1.084 | 0.042 |  |  |  |  | 1.014 | 0.991 | 1.037 | 0.239 |
| Unemployment, total (% of total labor<br>force) (national estimate) | 0.942 | 0.896 | 0.990 | 0.019 |  |  |  |  |       |       |       |       |

**Climate**

|                                    |       |       |       |       |       |       |       |       |       |       |       |       |
|------------------------------------|-------|-------|-------|-------|-------|-------|-------|-------|-------|-------|-------|-------|
| Max temperature (Celsius)          | 0.909 | 0.806 | 1.027 | 0.125 |       |       |       |       | 1.042 | 0.976 | 1.112 | 0.218 |
| Min temperature (Celsius)          | 1.122 | 0.999 | 1.258 | 0.051 |       |       |       |       | 0.940 | 0.872 | 1.012 | 0.101 |
| Relative humidity (%)              | 0.993 | 0.972 | 1.015 | 0.533 |       |       |       |       |       |       |       |       |
| Mean wind speed (.1 knots);        | 0.999 | 0.915 | 1.092 | 0.989 |       |       |       |       |       |       |       |       |
| Precipitation amount (.01 inches). | 0.281 | 0.064 | 1.235 | 0.093 | 0.425 | 0.123 | 1.471 | 0.177 |       |       |       |       |

†IRR is short for incidence rate ratio.

‡CI is short for confidence interval.
